# Supplementary material for: NPC2 as a Prognostic Biomarker for Glioblastoma Based on Integrated Bioinformatics Analysis and Cytological Experiments
Source: Front Genet. 2021 Mar 11;12:611442. doi: 10.3389/fgene.2021.611442 (PMC7990766; doi:10.3389/fgene.2021.611442)
Supplement: Supplementary file 1 [file Table_1.XLSX]

## Sheet: GSE102130_diff_significant
Table 1 differentially expressed genes of GSE102130
gene	Malignant_mean	NM_mean	log2FC	p_val	p_val_adj	pct.1	pct.2
BCAN	26.0544	0.914657	3.8207	1.98e-220	4.45e-216	0.983	0.134
SPP1	1.00975	102.617	-5.68811	1.62e-212	3.64e-208	0.08	0.899
LPCAT2	0.0363771	1.30056	-1.15044	1.32e-202	2.96e-198	0.588	0.855
ABCA2	0.177868	2.79158	-1.68662	5.78e-198	1.3e-193	0.484	0.575
TUBB4A	1.084	13.3589	-2.78452	8.61e-194	1.93e-189	0.624	0.503
FTL	8.30076	71.1394	-2.95537	1.28e-192	2.87e-188	0.917	0.983
GSN	0.453773	17.5963	-3.67714	4.69e-187	1.05e-182	0.147	0.944
FTH1	14.5083	55.668	-1.8695	6.04e-184	1.36e-179	0.997	0.989
MOG	0.344302	14.7315	-3.54872	1.58e-176	3.54e-172	0.632	0.827
EVI2A	0.330878	8.06376	-2.76773	1.5e-174	3.37e-170	0.245	0.894
GPM6A	13.7214	1.23436	2.71998	1.12e-171	2.51e-167	0.978	0.179
CLEC7A	0.0340508	2.10684	-1.58714	1.44e-170	3.24e-166	0.461	0.687
PTPRZ1	8.59345	0.861856	2.36531	2.14e-170	4.81e-166	0.971	0.128
GLDN	0.0111657	2.95154	-1.96639	7.11e-170	1.6e-165	0.025	0.816
PLP1	7.29707	258.012	-4.96428	6.72e-162	1.51e-157	0.629	0.575
DBNDD2	1.63873	41.583	-4.01236	3.43e-159	7.71e-155	0.443	0.626
C1orf61	18.3022	1.32644	3.05257	7.28e-158	1.63e-153	0.977	0.313
SYNGR2	0.21789	5.47361	-2.41019	4.54e-154	1.02e-149	0.162	0.883
FXYD6	10.1935	0.263818	3.1468	5.13e-153	1.15e-148	0.935	0.095
ADAMTS4	0.134316	2.33364	-1.55528	3.23e-151	7.25e-147	0.738	0.927
MAP2	3.86622	0.233732	1.97977	2.73e-150	6.13e-146	0.968	0.212
CTSS	0.0464546	2.62378	-1.79199	6.56e-150	1.47e-145	0.551	0.793
PADI2	0.347073	4.71067	-2.08383	2.72e-148	6.11e-144	0.389	0.916
CD68	0.0979608	3.58838	-2.06316	3.85e-148	8.64e-144	0.49	0.743
CNP	2.01771	21.5325	-2.90048	1.65e-147	3.71e-143	0.865	0.709
HAVCR2	0.0839706	2.51863	-1.69869	1.39e-146	3.12e-142	0.577	0.777
CD84	0.0290437	0.779434	-0.790114	3.66e-146	8.2e-142	0.719	0.894
SERPINB9	0.0616183	2.35205	-1.65878	4.67e-145	1.05e-140	0.557	0.737
SOX2-OT	2.76634	10.3215	-1.58783	1.26e-144	2.83e-140	0.89	0.525
TMSB4X	7.95278	61.4644	-2.80263	6.49e-142	1.46e-137	0.882	1
TUBB2B	19.4149	3.87948	2.06482	4.13e-141	9.26e-137	0.984	0.313
SLC12A2	0.190582	1.99297	-1.32991	8.86e-139	1.99e-134	0.47	0.603
SLC31A2	0.120862	5.04007	-2.42996	3.88e-138	8.71e-134	0.065	0.816
LIPA	0.593947	8.25132	-2.53706	2.01e-137	4.5e-133	0.269	0.911
TF	0.628641	31.7554	-4.32999	3.6e-136	8.08e-132	0.219	0.514
ITGAX	0.0100294	1.3049	-1.1903	2.92e-133	6.56e-129	0.176	0.525
PTAFR	0.0462892	1.12445	-1.02181	4.22e-132	9.46e-128	0.658	0.844
SLAIN1	0.385844	5.75094	-2.28432	2.11e-131	4.74e-127	0.43	0.542
LDHB	23.4733	5.9865	1.80857	2.5e-131	5.6e-127	0.991	0.916
PTGDS	1.04995	37.5771	-4.23409	4.64e-131	1.04e-126	0.223	0.503
APLP1	0.498196	8.47056	-2.66022	1.02e-129	2.28e-125	0.299	0.497
VCAN	2.13007	0.414837	1.14556	4.79e-129	1.07e-124	0.935	0.14
CLDND1	2.66728	37.9607	-3.40924	7.8e-128	1.75e-123	0.803	0.732
A2M	0.105321	10.4816	-3.37679	4.14e-126	9.3e-122	0.151	0.52
CNTN2	0.16254	2.22536	-1.47218	4.65e-125	1.04e-120	0.28	0.492
NEAT1	0.115389	2.15567	-1.5004	2.9e-124	6.5e-120	0.212	0.899
SLCO1A2	0.0204004	0.573499	-0.624841	7.68e-124	1.72e-119	0.556	0.76
SOX6	0.934368	0.0123408	0.934167	1e-122	2.25e-118	0.872	0.056
THEMIS2	0.0196957	1.78107	-1.4475	2.35e-120	5.28e-116	0.011	0.62
SIGLEC8	0.0128585	1.28722	-1.17517	9.08e-120	2.04e-115	0.276	0.52
SOX4	2.64308	0.1276	1.6919	8.95e-117	2.01e-112	0.918	0.173
GLUL	1.901	10.8132	-2.02578	7.93e-116	1.78e-111	0.816	0.983
RASGRP3	0.0157244	0.974138	-0.958714	5.53e-115	1.24e-110	0.023	0.659
GPRC5B	1.55511	9.02824	-1.97261	6.91e-113	1.55e-108	0.66	0.536
NCAN	1.05997	0.024267	1.00803	1.94e-111	4.36e-107	0.825	0.028
TNR	3.15315	0.177469	1.81852	4.2e-111	9.43e-107	0.84	0.045
CLDN11	0.580094	7.67218	-2.45638	8.18e-111	1.84e-106	0.516	0.782
ELL2	0.0404149	1.41011	-1.21194	6.02e-110	1.35e-105	0.11	0.788
TMEM144	0.10705	14.0999	-3.76974	7.98e-109	1.79e-104	0.066	0.603
PPP1R14A	0.0504698	6.36077	-2.80882	9.79e-109	2.2e-104	0.033	0.497
KIAA1598	0.220357	2.10882	-1.34906	1.12e-108	2.5e-104	0.31	0.888
RNASE1	0.0577753	16.9969	-4.08864	1.32e-108	2.96e-104	0.011	0.514
IFNGR1	0.650142	9.14808	-2.62054	2.93e-108	6.58e-104	0.33	0.849
SEC14L5	0.00599776	0.718468	-0.772496	4.56e-108	1.02e-103	0.141	0.503
CD74	0.470628	64.1134	-5.46845	2.07e-107	4.64e-103	0.06	0.486
SPTLC2	0.179706	1.3345	-0.984686	2.29e-107	5.14e-103	0.601	0.911
2021-09-04	0.600927	12.3697	-3.06199	3.54e-107	7.94e-103	0.215	0.531
TSC22D1	9.24108	1.42521	2.07819	3.66e-107	8.2e-103	0.934	0.324
ELOVL1	0.480422	9.48959	-2.82488	1.27e-106	2.84e-102	0.23	0.749
CSF1R	0.0125114	6.29017	-2.84801	2.35e-106	5.27e-102	0.032	0.436
ERMN	0.105102	14.7983	-3.83752	1.28e-105	2.88e-101	0.025	0.525
PIP4K2A	0.63278	5.91678	-2.08277	4.86e-105	1.09e-100	0.509	0.732
BIN1	0.333376	2.9826	-1.57863	1.52e-104	3.4e-100	0.362	0.849
CNTN1	4.41142	0.328922	2.02575	3e-104	6.73e-100	0.875	0.128
MS4A7	0.0122853	1.5578	-1.33729	4.08e-104	9.15e-100	0.177	0.547
PLEKHH1	0.12484	1.72187	-1.27488	5.2e-103	1.17e-98	0.479	0.704
SEMA4D	0.140652	1.78769	-1.28921	3.02e-102	6.79e-98	0.219	0.844
NFIB	1.41547	0.10092	1.13359	4.15e-102	9.31e-98	0.923	0.257
NPC2	0.620535	7.07635	-2.31723	4.39e-102	9.84e-98	0.207	0.883
CTSB	0.92225	9.38763	-2.434	1.32e-101	2.96e-97	0.885	0.966
PLA2G16	0.264461	5.54609	-2.37211	2.14e-101	4.81e-97	0.144	0.693
ANLN	0.0965872	3.80605	-2.13183	3.97e-101	8.9e-97	0.107	0.497
SIGLEC10	0.0525727	0.965543	-0.901008	4.45e-101	9.99e-97	0.596	0.799
2021-09-08	0.741153	3.75991	-1.45089	9.05e-101	2.03e-96	0.606	0.542
KLK6	0.0793062	9.58786	-3.29424	1.38e-100	3.1e-96	0.022	0.486
LAIR1	0.102825	1.16091	-0.970432	2.36e-100	5.3e-96	0.724	0.838
C3	0.0141011	8.32958	-3.20161	1.98e-99	4.44e-95	0.017	0.419
SERPINE2	9.07675	0.906922	2.40171	5.06e-99	1.14e-94	0.892	0.184
TMEM63A	0.0732796	2.36392	-1.64812	4.13e-98	9.27e-94	0.115	0.626
SEPP1	0.903117	41.1444	-4.46891	9.1e-98	2.04e-93	0.164	0.709
HSPA2	0.217682	6.7805	-2.67573	2.19e-97	4.92e-93	0.116	0.52
FHL1	4.70647	0.451489	1.97506	4.85e-97	1.09e-92	0.857	0.123
FOLH1	0.0168876	3.14773	-2.02816	1.6e-96	3.58e-92	0.019	0.486
CNDP1	0.0468777	11.147	-3.53644	6.03e-96	1.35e-91	0.013	0.48
PCDHGC3	3.74274	0.510804	1.65041	3.18e-95	7.13e-91	0.834	0.089
OLR1	0.0390906	8.78861	-3.23578	4.23e-95	9.5e-91	0.011	0.447
TMEM119	0.00671351	1.03912	-1.0183	5.24e-95	1.17e-90	0.125	0.419
CSRP1	1.06635	11.9824	-2.6514	6.63e-95	1.49e-90	0.335	0.52
FCER1G	0.0534036	11.801	-3.60312	1.15e-94	2.57e-90	0.011	0.453
LAPTM5	0.126685	12.8691	-3.62172	1.59e-94	3.57e-90	0.028	0.458
RNF220	0.134243	1.20633	-0.959916	2.22e-94	4.97e-90	0.391	0.631
MOBP	0.0394336	3.51611	-2.11928	2.71e-94	6.08e-90	0.03	0.497
SLCO2B1	0.00464195	2.60661	-1.84396	5.02e-94	1.13e-89	0.013	0.419
FCGRT	0.30496	2.34573	-1.35832	1.01e-93	2.28e-89	0.361	0.453
PEX5L	0.0562968	0.843664	-0.803561	1.45e-93	3.25e-89	0.419	0.698
LDB3	0.0199607	0.789597	-0.811121	1.56e-93	3.49e-89	0.226	0.542
TYROBP	0.0552164	9.30585	-3.28785	1.72e-93	3.86e-89	0.007	0.453
C5AR1	0.0342703	2.25919	-1.6559	2.2e-93	4.93e-89	0.087	0.469
ITGB2	0.0146032	3.44926	-2.13265	3.15e-93	7.06e-89	0.009	0.458
RGS1	0.28954	51.8649	-5.35738	7.9e-93	1.77e-88	0.037	0.43
LAMP2	1.08311	7.19563	-1.97611	1.2e-92	2.7e-88	0.746	0.978
CAPN3	0.198095	8.7302	-3.02173	1.46e-92	3.28e-88	0.075	0.603
CA2	0.159137	11.3229	-3.41022	1.97e-92	4.42e-88	0.049	0.531
CD37	0.0149295	3.03037	-1.98953	5.36e-92	1.2e-87	0.012	0.436
ENPP2	0.221302	12.0679	-3.41953	8.67e-92	1.94e-87	0.052	0.503
PTPRC	0.0375264	1.8446	-1.45508	1.25e-91	2.81e-87	0.129	0.536
PTN	11.2422	3.13876	1.56459	2.48e-91	5.57e-87	0.974	0.508
C1QC	0.0207598	10.3372	-3.47334	2.59e-91	5.81e-87	0.004	0.413
C1QB	0.0346962	15.8504	-4.0255	5.82e-91	1.31e-86	0.003	0.408
SORL1	0.212656	2.10752	-1.35759	1.11e-90	2.49e-86	0.363	0.872
SLC24A2	0.0473758	1.30473	-1.13782	1.3e-90	2.91e-86	0.194	0.626
FPR1	0.0236725	4.20821	-2.34703	1.96e-90	4.39e-86	0.004	0.441
RNF130	1.05967	5.49572	-1.65708	2.48e-90	5.57e-86	0.596	0.899
RPLP0	39.3121	10.4971	1.80994	9.73e-90	2.18e-85	0.996	0.989
SRGN	0.356331	21.9675	-4.08181	1.31e-89	2.94e-85	0.024	0.464
ALOX5AP	0.0232575	6.14787	-2.80435	1.52e-89	3.41e-85	0.005	0.441
TBXAS1	0.00485897	2.08125	-1.61652	1.84e-89	4.12e-85	0.022	0.436
RNASET2	0.140317	7.34237	-2.87102	2.43e-89	5.46e-85	0.107	0.453
CX3CR1	0.0161501	6.94941	-2.96773	2.9e-89	6.5e-85	0.011	0.408
HLA-DRB1	0.0899357	6.12372	-2.70839	3.88e-89	8.7e-85	0.045	0.441
NKAIN4	2.91658	0.298283	1.59299	4.48e-89	1.01e-84	0.751	0.034
HLA-E	0.443505	7.19057	-2.50439	1.65e-88	3.71e-84	0.407	0.726
HLA-DRA	0.540489	41.117	-4.77294	1.82e-88	4.08e-84	0.058	0.464
NLRP3	0.0358093	1.73333	-1.3999	2.12e-88	4.75e-84	0.21	0.497
DPYSL3	1.40592	0.0225441	1.23443	2.19e-88	4.92e-84	0.77	0.05
PACS2	0.135323	0.77992	-0.648709	2.57e-88	5.76e-84	0.83	0.939
MAG	0.331338	14.5306	-3.54417	7.08e-87	1.59e-82	0.037	0.48
ARHGDIB	0.11159	6.53092	-2.7602	7.1e-87	1.59e-82	0.022	0.475
SLC5A11	0.000511057	1.5119	-1.32804	9.03e-87	2.03e-82	0.005	0.419
SLC48A1	0.493988	3.87626	-1.70661	9.87e-87	2.22e-82	0.652	0.799
TPP1	0.381445	2.76295	-1.44569	1.13e-86	2.53e-82	0.392	0.916
IPCEF1	0.0118541	0.635728	-0.692932	1.64e-86	3.67e-82	0.271	0.553
GJB1	0.0483207	3.9228	-2.2314	2.47e-86	5.54e-82	0.035	0.475
CARNS1	0.0274791	1.72921	-1.40938	2.97e-86	6.65e-82	0.039	0.497
AIF1	0.00470096	3.73732	-2.2373	4.14e-86	9.28e-82	0.002	0.413
ACSL1	0.139576	1.82974	-1.31217	4.28e-86	9.6e-82	0.148	0.788
QDPR	1.6525	17.1946	-2.77808	4.77e-86	1.07e-81	0.559	0.603
RAPGEF5	0.0289162	1.38365	-1.21205	4.83e-86	1.08e-81	0.074	0.508
C3AR1	0.00820303	3.41614	-2.131	5.57e-86	1.25e-81	0.007	0.419
AXL	0.25767	2.68146	-1.54953	6.15e-86	1.38e-81	0.802	0.888
PDK4	0.132847	5.32082	-2.48016	9.43e-86	2.12e-81	0.049	0.592
PLD4	0.00477977	3.48549	-2.15839	9.86e-86	2.21e-81	0.005	0.397
OLFML3	0.0217873	4.30444	-2.37611	1.38e-85	3.09e-81	0.014	0.425
TREM2	0.026762	7.83429	-3.10501	2.65e-85	5.95e-81	0.004	0.402
RHBDF2	0.00210939	0.96385	-0.970645	6.21e-85	1.39e-80	0.011	0.447
SYK	0.0149719	0.601031	-0.657562	7.25e-85	1.63e-80	0.271	0.575
LCP2	0.00314405	0.667582	-0.733229	1.29e-84	2.9e-80	0.005	0.441
CYBA	0.00951874	1.70783	-1.42347	2.16e-84	4.84e-80	0.004	0.425
CSF3R	0.00527499	0.964269	-0.966402	5.78e-84	1.3e-79	0.008	0.441
DBN1	1.46519	0.113235	1.14694	6.29e-84	1.41e-79	0.765	0.056
CYBB	0.00729548	2.35979	-1.73789	6.92e-84	1.55e-79	0.012	0.43
C1QA	0.0241917	5.83609	-2.73869	7.52e-84	1.69e-79	0.004	0.402
HLA-DPA1	0.206587	12.9286	-3.52904	3.32e-83	7.45e-79	0.028	0.447
APOC2	0.0147183	7.15109	-3.00591	3.6e-83	8.08e-79	0.007	0.391
SORT1	0.175248	1.70711	-1.20379	4.16e-83	9.33e-79	0.333	0.816
SLC11A1	0.00679855	1.06324	-1.03514	4.52e-83	1.01e-78	0.023	0.453
CCL3	0.0816597	38.5222	-5.19134	6.48e-83	1.45e-78	0.009	0.413
ITM2B	7.66025	24.5408	-1.56032	8.3e-83	1.86e-78	0.925	1
TNFRSF1B	0.0300936	0.76944	-0.780518	1.27e-82	2.86e-78	0.283	0.57
ADORA3	0.0194219	3.31759	-2.08248	1.43e-82	3.2e-78	0.007	0.419
ITGAM	0.00163383	0.723862	-0.783289	1.43e-82	3.21e-78	0.004	0.419
ST18	0.00672233	0.618929	-0.685374	1.45e-82	3.26e-78	0.023	0.492
LRRN1	1.2831	0.058481	1.109	1.58e-82	3.54e-78	0.778	0.078
FCGR3A	0.0147655	4.71413	-2.49339	5.66e-82	1.27e-77	0.006	0.402
HNRNPA1	29.7143	7.95046	1.77888	6.18e-82	1.39e-77	0.982	0.944
SERPINA1	0.00133541	1.21209	-1.14348	6.82e-82	1.53e-77	0.005	0.397
ETV1	1.72613	0.0560212	1.36821	7.55e-82	1.69e-77	0.776	0.084
P2RY12	0.0496672	7.00886	-2.93166	1.51e-81	3.38e-77	0.018	0.413
CD86	0.0134016	1.6819	-1.40405	1.61e-81	3.61e-77	0.004	0.413
CECR1	0.0924849	1.16618	-0.987537	1.78e-81	4e-77	0.454	0.754
CDK18	0.0756835	1.52062	-1.22853	1.8e-81	4.05e-77	0.149	0.553
TPPP	0.0720832	1.31709	-1.11189	1.88e-81	4.22e-77	0.192	0.503
LILRB4	0.00417885	2.0826	-1.61813	3.3e-81	7.39e-77	0.004	0.397
MBP	3.32642	46.2488	-3.44903	3.81e-81	8.54e-77	0.295	0.721
CD83	0.2707	8.25116	-2.86401	4.01e-81	9e-77	0.156	0.447
PCDH15	1.09369	0.073719	0.963434	4.77e-81	1.07e-76	0.774	0.078
FCGR2A	0.0342465	2.4543	-1.73981	1.1e-80	2.48e-76	0.051	0.497
DOCK8	0.00917648	1.13357	-1.08009	1.42e-80	3.18e-76	0.014	0.453
CD53	0.0955291	5.63173	-2.59776	1.73e-80	3.89e-76	0.012	0.436
SERPINB1	0.040472	0.745436	-0.746349	1.97e-80	4.42e-76	0.355	0.654
LGALS9	0.00980799	1.17542	-1.10721	2.12e-80	4.77e-76	0.026	0.441
LAT2	0.0291466	2.75249	-1.8664	3.28e-80	7.35e-76	0.033	0.425
CSF2RA	0.0139878	0.581188	-0.640968	3.73e-80	8.38e-76	0.16	0.469
PMP22	0.666499	10.5684	-2.7953	4.48e-80	1e-75	0.187	0.531
MAN2A1	0.0317887	0.626598	-0.65671	8.88e-80	1.99e-75	0.111	0.693
TMEM125	0.0758225	3.34108	-2.01261	1.09e-79	2.44e-75	0.014	0.464
ARPC1B	0.0522758	2.59352	-1.77189	1.57e-79	3.52e-75	0.068	0.48
HLA-DMB	0.0463223	5.68615	-2.67585	1.93e-79	4.34e-75	0.018	0.43
HLA-DQB1	0.0531268	2.92911	-1.89952	2.47e-79	5.54e-75	0.102	0.397
C10orf54	0.0515967	1.68229	-1.35088	2.57e-79	5.77e-75	0.076	0.575
HCLS1	0.0194165	2.17953	-1.64107	3.79e-79	8.5e-75	0.009	0.43
HLA-DMA	0.0591088	4.38087	-2.34499	2.77e-78	6.21e-74	0.046	0.43
TUBB3	3.4412	0.0929452	2.02273	2.8e-78	6.29e-74	0.753	0.084
SELPLG	0.0253966	2.86422	-1.914	5.22e-78	1.17e-73	0.025	0.441
RHOG	0.321965	3.02566	-1.60654	1.5e-77	3.37e-73	0.168	0.76
SEMA3B	0.122253	1.69637	-1.26462	1.58e-77	3.54e-73	0.198	0.469
NCKAP1L	0.00349044	0.769198	-0.818069	2.64e-77	5.91e-73	0.007	0.413
S1PR5	0.00462514	1.10191	-1.06504	3.47e-77	7.78e-73	0.018	0.436
SAMSN1	0.0203293	2.92945	-1.94529	1.09e-76	2.46e-72	0.009	0.419
BHLHE41	0.0356112	0.714979	-0.727708	1.46e-76	3.27e-72	0.072	0.637
CRMP1	1.1644	0.0730441	1.01226	1.7e-76	3.82e-72	0.707	0.034
COL11A1	0.785575	0.0343609	0.787649	2.28e-76	5.11e-72	0.726	0.05
PLXDC2	0.165789	3.55774	-1.96701	2.99e-76	6.72e-72	0.134	0.52
ASCL1	1.60964	0.061633	1.29756	5.02e-76	1.13e-71	0.697	0.028
PDGFRA	6.37979	0.508097	2.29085	1.66e-75	3.73e-71	0.743	0.067
CD4	0.0179059	1.62157	-1.36483	2.53e-75	5.67e-71	0.021	0.419
FAM5C	1.67349	0.133103	1.23844	3.03e-75	6.8e-71	0.7	0.034
IGSF6	0.00794677	1.71848	-1.43138	3.13e-75	7.03e-71	0.019	0.369
CCND2	1.60974	0.160768	1.16882	3.3e-75	7.41e-71	0.867	0.246
MARCKS	3.12421	0.9783	1.05986	9.21e-75	2.07e-70	0.978	0.542
SCG3	2.31434	0.216423	1.44608	1.24e-74	2.77e-70	0.838	0.212
VSIG4	0.0134781	3.62225	-2.18928	1.32e-74	2.95e-70	0.005	0.374
SLC2A5	0.00793747	1.46124	-1.28798	1.36e-74	3.05e-70	0.012	0.402
ADAM28	0.00827749	2.36481	-1.73863	1.48e-74	3.33e-70	0.008	0.385
MS4A6A	0.00724857	1.94883	-1.54972	1.87e-74	4.2e-70	0.008	0.397
HAPLN2	0.0115058	0.90198	-0.910998	1.96e-74	4.4e-70	0.056	0.441
MSR1	0.00329245	0.859868	-0.890458	2.45e-74	5.49e-70	0.006	0.391
ABCA8	0.00777815	0.6737	-0.731863	3.34e-74	7.49e-70	0.018	0.441
CPXM1	1.41637	0.0757748	1.16747	6.65e-74	1.49e-69	0.695	0.034
MYO1F	0.00226713	0.677035	-0.742646	6.9e-74	1.55e-69	0.029	0.43
S100A11	0.242313	5.37884	-2.36027	8.84e-74	1.98e-69	0.094	0.469
NME1	7.13715	0.951872	2.05966	1.97e-73	4.42e-69	0.867	0.352
MAGED1	3.30115	0.518847	1.50175	2.53e-73	5.68e-69	0.914	0.413
LDLRAP1	0.00893809	0.748163	-0.793002	4.85e-73	1.09e-68	0.014	0.436
LUZP2	1.53985	0.173907	1.11343	6.15e-73	1.38e-68	0.885	0.307
HBEGF	0.0945844	2.42872	-1.64729	6.21e-73	1.39e-68	0.08	0.592
TMC6	0.0694235	0.893547	-0.824258	1.06e-72	2.37e-68	0.076	0.642
ST6GAL1	0.532075	3.54447	-1.56863	3.35e-72	7.51e-68	0.418	0.464
APBB1IP	0.00364704	0.86574	-0.894496	3.39e-72	7.6e-68	0.007	0.385
DPP6	1.4671	0.206515	1.03197	5.78e-72	1.3e-67	0.864	0.251
PARVG	0.00663998	0.967708	-0.966968	9.93e-72	2.23e-67	0.004	0.374
IFI30	0.0364221	3.71189	-2.1847	1.97e-71	4.42e-67	0.024	0.436
LANCL1	0.809785	4.13282	-1.50393	4.02e-71	9.01e-67	0.528	0.536
FGD2	0.00797973	0.57933	-0.647846	6.72e-71	1.51e-66	0.049	0.453
CXCL16	0.400089	3.43949	-1.66488	7.3e-71	1.64e-66	0.492	0.609
SERPINE1	0.0230557	3.46072	-2.12439	7.42e-71	1.66e-66	0.056	0.419
TTYH2	0.265539	3.29495	-1.76289	7.65e-71	1.72e-66	0.208	0.642
EVI2B	0.0535006	2.28056	-1.63875	1.22e-70	2.74e-66	0.043	0.48
GPM6B	18.6554	31.24	-0.713922	1.26e-70	2.83e-66	0.978	0.609
LPAR5	0.00408776	1.05997	-1.03674	1.53e-70	3.44e-66	0.006	0.369
LPAR1	0.126825	1.86375	-1.34564	1.74e-70	3.91e-66	0.073	0.603
GPR37	0.0313474	1.5062	-1.28097	2.2e-70	4.93e-66	0.022	0.453
PLCB2	0.0152362	0.865017	-0.877373	3.09e-70	6.94e-66	0.043	0.436
MAP7	0.0245487	0.736623	-0.761296	3.5e-70	7.86e-66	0.069	0.508
OSTF1	0.139695	1.96932	-1.38149	3.92e-70	8.8e-66	0.09	0.62
SP100	0.0848747	0.883706	-0.796045	4.28e-70	9.6e-66	0.749	0.888
MTUS1	0.136106	1.6796	-1.23792	4.66e-70	1.05e-65	0.163	0.698
GABBR1	0.908961	0.0829106	0.817873	6.92e-70	1.55e-65	0.789	0.145
PTPN6	0.0109893	1.42471	-1.26204	7.15e-70	1.6e-65	0.023	0.397
NR4A2	0.214125	2.18372	-1.3908	9.29e-70	2.08e-65	0.27	0.469
ABI3	0.00096064	0.739028	-0.796896	1.94e-69	4.36e-65	0.004	0.352
ZDHHC9	0.490016	2.16662	-1.08762	2.04e-69	4.57e-65	0.518	0.547
IL1B	0.119845	9.41019	-3.21663	2.89e-69	6.49e-65	0.007	0.369
EEF1G	26.4647	9.40812	1.39987	4.38e-69	9.83e-65	0.982	0.983
ARRDC2	0.0248685	0.643499	-0.681332	7.66e-69	1.72e-64	0.043	0.525
FYB	0.0273147	1.00069	-0.961617	8.19e-69	1.84e-64	0.023	0.458
MBNL2	0.239845	2.00543	-1.27741	8.37e-69	1.88e-64	0.343	0.698
FGL2	0.0224534	0.894945	-0.890121	8.96e-69	2.01e-64	0.161	0.475
ZEB1	1.17176	0.106746	0.972542	1.3e-68	2.91e-64	0.779	0.14
SLA	0.0339357	1.46846	-1.25547	1.88e-68	4.22e-64	0.014	0.425
SMOC1	1.67976	0.187827	1.17378	2.6e-68	5.83e-64	0.858	0.285
MAL	0.113548	3.06406	-1.86776	2.75e-68	6.16e-64	0.05	0.469
VAMP3	0.582267	3.80324	-1.60202	4.25e-68	9.53e-64	0.342	0.765
IL18	0.0160644	1.26461	-1.15627	5.85e-68	1.31e-63	0.096	0.458
MYRF	0.186239	1.69966	-1.18639	6.54e-68	1.47e-63	0.261	0.492
SIGLEC14	0.0043771	0.545502	-0.621775	6.55e-68	1.47e-63	0.077	0.369
MEG3	4.23752	0.238055	2.08081	1.25e-67	2.81e-63	0.84	0.324
NTRK2	3.31573	0.331599	1.69645	1.27e-67	2.86e-63	0.882	0.324
CCL3L3	0.0395031	6.86139	-2.91889	1.96e-67	4.4e-63	0.006	0.363
CCL4	0.286554	49.2974	-5.2889	1.98e-67	4.45e-63	0.011	0.38
MYLK	0.101962	2.01799	-1.45352	2.15e-67	4.81e-63	0.135	0.453
IRF8	0.0473975	2.4789	-1.73182	2.95e-67	6.62e-63	0.046	0.413
CTSD	1.9303	6.919	-1.43427	5.54e-67	1.24e-62	0.703	0.966
SEZ6L	1.35106	0.119634	1.07028	6.23e-67	1.4e-62	0.706	0.067
LSAMP	1.06267	0.183545	0.801399	6.33e-67	1.42e-62	0.919	0.419
BEX1	4.7583	0.588037	1.8584	7.81e-67	1.75e-62	0.809	0.201
LY86	0.00957556	2.33378	-1.72341	9.74e-67	2.19e-62	0.003	0.335
CD14	0.015189	3.9049	-2.27248	1.28e-66	2.86e-62	0.014	0.363
RGS10	0.055408	2.64742	-1.78908	1.3e-66	2.92e-62	0.03	0.402
CPM	0.245129	1.21738	-0.832557	2.9e-66	6.51e-62	0.753	0.933
CH25H	0.118018	11.2408	-3.45268	3.06e-66	6.86e-62	0.018	0.397
HCK	0.00184304	0.772133	-0.82283	3.65e-66	8.2e-62	0.005	0.346
WASF2	0.389709	1.49825	-0.846136	3.91e-66	8.77e-62	0.606	0.95
HLA-DRB5	0.0225971	0.910611	-0.901796	6.84e-66	1.53e-61	0.034	0.43
CD300A	0.00363962	0.861326	-0.891089	8.26e-66	1.85e-61	0.004	0.346
CCL4L1	0.0517318	22.3255	-4.47107	8.69e-66	1.95e-61	0.01	0.369
CCL4L2	0.0517318	22.3255	-4.47107	8.69e-66	1.95e-61	0.01	0.369
HLA-DPB1	0.0579461	1.25877	-1.09427	1.29e-65	2.89e-61	0.103	0.419
FADS2	0.805958	0.0807469	0.740735	1.66e-65	3.72e-61	0.684	0.056
PLVAP	0.000807284	0.57945	-0.658258	1.73e-65	3.87e-61	0.004	0.335
PLEKHB1	2.82969	9.13267	-1.40372	2.22e-65	4.97e-61	0.737	0.575
SAT1	3.39793	29.2539	-2.78222	7.88e-65	1.77e-60	0.55	0.642
SLC38A1	1.04934	0.118459	0.873644	9.32e-65	2.09e-60	0.805	0.201
FLJ41200	0.029233	0.936857	-0.912148	1.18e-64	2.64e-60	0.194	0.374
CXorf21	0.0120883	0.776613	-0.811794	1.5e-64	3.37e-60	0.19	0.43
RPSA	33.7248	11.9387	1.42428	1.56e-64	3.49e-60	0.988	0.972
TSPAN3	6.31549	1.69517	1.44058	1.86e-64	4.18e-60	0.972	0.76
DLG2	0.0683758	0.801197	-0.753537	1.87e-64	4.19e-60	0.208	0.536
NINJ2	0.100681	2.32461	-1.59479	1.92e-64	4.3e-60	0.047	0.508
MMP16	0.694751	0.0618022	0.674558	2.6e-64	5.83e-60	0.687	0.061
CBS	1.31629	0.0657151	1.12	7.61e-64	1.71e-59	0.661	0.045
S100B	6.56847	23.7653	-1.71024	1.28e-63	2.88e-59	0.819	0.609
B2M	18.7673	65.0433	-1.7403	1.35e-63	3.03e-59	0.932	1
B4GALT1	0.0816399	1.27455	-1.07236	1.78e-63	4e-59	0.156	0.453
ZFP36	1.19839	12.1884	-2.58475	3.77e-63	8.45e-59	0.362	0.642
HLA-DOA	0.0321165	0.569406	-0.604613	4.92e-63	1.1e-58	0.272	0.447
STOM	0.139815	1.5788	-1.1779	8.53e-63	1.91e-58	0.397	0.754
APOD	8.62085	23.3297	-1.33848	1.5e-62	3.37e-58	0.744	0.525
MLLT11	4.71595	0.380989	2.04929	2.14e-62	4.8e-58	0.808	0.263
NREP	2.78406	0.224214	1.62808	2.52e-62	5.66e-58	0.734	0.128
GPR56	2.56388	0.716092	1.05432	2.58e-62	5.8e-58	0.928	0.43
LHPP	0.0765201	0.790302	-0.733828	5.43e-62	1.22e-57	0.194	0.553
GPR34	0.115666	4.90405	-2.4038	6.3e-62	1.41e-57	0.071	0.397
CYTH4	0.00113208	0.544398	-0.625413	6.71e-62	1.51e-57	0.002	0.313
AOAH	0.0110681	1.06436	-1.02981	6.77e-62	1.52e-57	0.022	0.385
DLGAP1	0.527512	0.0148028	0.589984	6.82e-62	1.53e-57	0.634	0.034
NCOA7	0.0520859	0.649821	-0.649057	7.53e-62	1.69e-57	0.297	0.715
RPL37A	23.847	8.08365	1.45173	7.99e-62	1.79e-57	0.988	0.983
DHRS9	0.0141401	1.95252	-1.54169	8.38e-62	1.88e-57	0.007	0.335
PLEK	0.0156165	1.37797	-1.22738	9.25e-62	2.07e-57	0.012	0.363
ARC	2.66223	0.0704592	1.77449	1.11e-61	2.49e-57	0.64	0.039
KIAA0247	0.123822	1.08896	-0.894372	1.42e-61	3.19e-57	0.249	0.704
CSPG4	1.19414	0.174501	0.901611	1.48e-61	3.32e-57	0.735	0.117
C10orf90	0.0210749	0.715048	-0.74816	1.54e-61	3.45e-57	0.029	0.436
EPB41L2	0.643701	2.93853	-1.26071	1.63e-61	3.66e-57	0.528	0.872
THY1	2.08975	0.517614	1.02568	2.59e-61	5.81e-57	0.757	0.14
FCGR1A	0.0136692	1.62231	-1.37125	3.02e-61	6.78e-57	0.025	0.369
LILRA2	0.00309658	0.704675	-0.765037	3.23e-61	7.24e-57	0.003	0.318
GPX1	2.6081	10.5106	-1.67365	3.65e-61	8.19e-57	0.742	0.648
GPD1	0.0573693	1.99362	-1.50141	3.72e-61	8.34e-57	0.043	0.425
SASH3	0.00452251	0.605446	-0.676465	4.15e-61	9.3e-57	0.007	0.346
PSAP	7.83669	22.1583	-1.38995	5.62e-61	1.26e-56	0.968	0.994
GPR183	0.124394	3.97539	-2.14566	5.95e-61	1.33e-56	0.045	0.385
CMTM5	0.282588	1.34881	-0.872874	1.03e-60	2.31e-56	0.369	0.497
EPB41L3	0.1122	1.29436	-1.04468	3.07e-60	6.88e-56	0.171	0.598
APOC1	0.0684578	4.36893	-2.32911	3.09e-60	6.92e-56	0.03	0.369
HLA-DQA1	0.0140308	3.08928	-2.01175	3.73e-60	8.38e-56	0.004	0.318
PTPRS	1.09748	0.295289	0.695381	4.79e-60	1.07e-55	0.965	0.57
LCP1	0.0621808	1.46297	-1.21337	7.18e-60	1.61e-55	0.03	0.441
KCND2	0.815896	0.0795329	0.750274	7.21e-60	1.62e-55	0.633	0.039
DUSP1	4.21966	32.495	-2.68192	1.83e-59	4.1e-55	0.664	0.81
NIPAL3	0.228574	1.52038	-1.03666	3.23e-59	7.24e-55	0.408	0.676
CYFIP1	0.542372	2.71961	-1.27	6.21e-59	1.39e-54	0.507	0.542
NFKBID	0.0351858	1.60014	-1.3287	6.6e-59	1.48e-54	0.046	0.397
CALCRL	1.07926	0.0713548	0.956634	8.19e-59	1.84e-54	0.684	0.089
CA10	2.79227	0.310619	1.53281	7.47e-58	1.68e-53	0.609	0.034
BIN2	0.0154936	1.0415	-1.00745	7.81e-58	1.75e-53	0.007	0.33
RCN1	2.72271	0.378538	1.43321	8.83e-58	1.98e-53	0.755	0.173
NECAB1	0.14634	1.45954	-1.10136	1.02e-57	2.3e-53	0.214	0.492
BLNK	0.00501931	0.96496	-0.967277	1.56e-57	3.49e-53	0.008	0.307
ACY3	0.0033333	1.90055	-1.53153	2.57e-57	5.76e-53	0.004	0.296
CD9	3.37312	12.2027	-1.5941	2.7e-57	6.07e-53	0.554	0.899
PRDX2	5.45744	1.36338	1.45011	2.83e-57	6.35e-53	0.903	0.553
NDRG1	0.0929135	0.981358	-0.85831	3.03e-57	6.79e-53	0.165	0.559
TMEM59L	1.74847	0.241167	1.14693	4.52e-57	1.01e-52	0.822	0.274
VAMP8	0.0287969	1.13536	-1.05352	4.92e-57	1.1e-52	0.012	0.358
PAQR8	0.0981978	1.16474	-0.979059	5.22e-57	1.17e-52	0.218	0.603
SPOCK3	1.25651	6.33392	-1.70049	7.99e-57	1.79e-52	0.414	0.508
CBX5	1.72231	0.371059	0.989542	9.07e-57	2.04e-52	0.983	0.922
ROGDI	0.221627	1.96499	-1.27922	9.51e-57	2.13e-52	0.206	0.575
HN1	3.26358	0.357634	1.65097	1.34e-56	3.01e-52	0.801	0.274
ASPA	0.0347365	1.45695	-1.24761	2.34e-56	5.24e-52	0.023	0.391
SCD	1.76627	8.90091	-1.83962	3.25e-56	7.3e-52	0.849	0.866
ITM2C	6.51886	1.53346	1.56941	3.27e-56	7.33e-52	0.904	0.425
SGK1	1.28933	11.3623	-2.43295	5.51e-56	1.24e-51	0.401	0.782
MAPK8IP1	0.156822	0.80043	-0.638174	8.94e-56	2.01e-51	0.375	0.469
RPS5	36.1987	10.6993	1.66883	1.1e-55	2.47e-51	0.97	0.972
RNASE6	0.00234248	1.3261	-1.21454	1.5e-55	3.37e-51	0.004	0.285
SSR2	8.59231	2.51379	1.44885	2.39e-55	5.36e-51	0.919	0.665
BTK	0.00486696	0.635092	-0.702367	2.75e-55	6.18e-51	0.007	0.313
SERPINI1	0.187192	3.84752	-2.02969	2.76e-55	6.19e-51	0.09	0.469
MEST	7.98147	0.582441	2.5048	3.61e-55	8.1e-51	0.784	0.235
MVP	0.0375838	0.700592	-0.712809	6.01e-55	1.35e-50	0.036	0.441
MAP3K8	0.0218545	1.36323	-1.20957	6.57e-55	1.47e-50	0.025	0.358
TRIM22	0.0431421	0.98682	-0.929525	7.14e-55	1.6e-50	0.024	0.402
ADAP2	0.00562764	0.578039	-0.650037	1.39e-54	3.11e-50	0.021	0.352
FAM102A	0.154763	1.18195	-0.918022	1.5e-54	3.37e-50	0.262	0.52
IL10RA	0.0168831	0.765807	-0.796174	1.53e-54	3.43e-50	0.026	0.385
SLC1A1	1.28906	0.0472441	1.12815	2.87e-54	6.44e-50	0.631	0.067
INPP5D	0.0523384	0.802612	-0.77649	3.93e-54	8.83e-50	0.037	0.441
TRIM2	0.734885	2.15851	-0.864402	6.47e-54	1.45e-49	0.702	0.559
FABP7	5.51941	0.412769	2.20622	7.2e-54	1.62e-49	0.615	0.05
NRCAM	1.02146	0.0914911	0.8891	8.27e-54	1.86e-49	0.706	0.134
FAM107B	0.131388	1.82538	-1.32035	9.56e-54	2.14e-49	0.139	0.525
RAB40B	0.16231	1.84536	-1.29162	1.03e-53	2.3e-49	0.131	0.475
TSC22D3	0.999594	8.16513	-2.19645	1.13e-53	2.53e-49	0.29	0.726
C17orf76-AS1	2.5039	0.575449	1.1532	1.19e-53	2.66e-49	0.886	0.626
PDGFB	0.00555551	0.57871	-0.650753	1.21e-53	2.7e-49	0.005	0.302
NUDT11	1.10323	0.0691134	0.97619	1.36e-53	3.06e-49	0.521	0.006
PLAUR	0.0704814	3.18854	-1.96819	3.47e-53	7.78e-49	0.044	0.425
SLC7A7	0.0181561	1.16265	-1.08684	3.56e-53	7.99e-49	0.03	0.324
ARHGEF37	0.0210146	0.595277	-0.643803	6.49e-53	1.46e-48	0.043	0.425
PILRA	0.0632009	1.45243	-1.2058	9.63e-53	2.16e-48	0.087	0.419
PROM1	0.909508	0.0885709	0.810766	1e-52	2.24e-48	0.6	0.045
TLR2	0.0170559	1.09392	-1.04181	1.03e-52	2.3e-48	0.027	0.352
HHIP	0.0276223	0.813193	-0.819223	1.06e-52	2.38e-48	0.065	0.397
KLF6	0.595974	3.35235	-1.44736	1.07e-52	2.41e-48	0.563	0.654
GRM3	0.0857381	1.27981	-1.07024	1.13e-52	2.55e-48	0.109	0.48
CAPG	0.08425	2.38244	-1.64137	1.18e-52	2.64e-48	0.039	0.385
SOX2	0.654118	0.0769916	0.619055	1.88e-52	4.23e-48	0.778	0.235
NOVA1	1.73439	0.321974	1.04852	3.21e-52	7.19e-48	0.84	0.33
CD33	0.00132163	0.71958	-0.780151	8.87e-52	1.99e-47	0.004	0.268
NAPSB	0.0108755	2.36447	-1.73477	1.7e-51	3.82e-47	0.022	0.268
SNRPE	2.52634	0.414771	1.3176	1.88e-51	4.21e-47	0.815	0.33
FEZ1	3.70035	17.3615	-1.96585	3.03e-51	6.8e-47	0.808	0.687
RNF182	0.952109	0.019733	0.936842	3.23e-51	7.25e-47	0.559	0.028
NR4A3	0.0973055	0.98077	-0.852096	3.85e-51	8.64e-47	0.235	0.408
FGF1	0.07814	1.3463	-1.12184	5.52e-51	1.24e-46	0.055	0.441
ODC1	2.0751	0.217725	1.33645	5.72e-51	1.28e-46	0.711	0.156
GFAP	8.36819	0.796057	2.38294	6.1e-51	1.37e-46	0.692	0.128
RPL29	22.5186	7.31231	1.50048	1.15e-50	2.59e-46	0.966	0.927
FA2H	0.0509519	0.779758	-0.759984	1.21e-50	2.7e-46	0.121	0.464
THBS4	0.825922	0.0637804	0.779425	1.33e-50	2.98e-46	0.595	0.05
PRRG1	0.09495	1.0592	-0.91122	1.69e-50	3.79e-46	0.172	0.525
CNTNAP4	0.0506316	1.12554	-1.01657	2.28e-50	5.12e-46	0.061	0.425
NONO	5.251	1.99693	1.0606	2.53e-50	5.67e-46	0.977	0.883
ALOX5	0.0292245	0.636842	-0.669358	2.58e-50	5.78e-46	0.026	0.385
NNAT	3.76998	0.0103916	2.23907	7.67e-50	1.72e-45	0.531	0.022
CDC42EP2	0.045915	0.975783	-0.917659	7.69e-50	1.72e-45	0.053	0.408
LINC00461	1.17742	0.110047	0.972001	1.01e-49	2.27e-45	0.613	0.067
CORO1A	0.186238	2.82262	-1.68817	1.14e-49	2.56e-45	0.094	0.408
LILRA4	0.000438482	1.19412	-1.13301	1.57e-49	3.53e-45	0.004	0.257
TREM1	0.0143303	0.795296	-0.823694	1.86e-49	4.17e-45	0.008	0.302
TM6SF1	0.103862	1.88675	-1.38689	2.59e-49	5.8e-45	0.126	0.425
LHFPL3	1.77694	0.207841	1.20107	2.62e-49	5.88e-45	0.585	0.05
NGFRAP1	6.26417	2.48311	1.06042	3.39e-49	7.61e-45	0.943	0.542
ATP1A2	3.14585	0.703808	1.28291	4.11e-49	9.23e-45	0.809	0.341
ANTXR1	0.604671	0.0676738	0.587807	6.58e-49	1.48e-44	0.645	0.095
BACE1	0.239675	1.10979	-0.76714	9.51e-49	2.13e-44	0.51	0.592
FIBIN	1.53497	0.0323743	1.296	1.35e-48	3.03e-44	0.54	0.028
MDK	1.26917	0.244534	0.866556	2.54e-48	5.71e-44	0.575	0.05
ST6GALNAC3	0.14689	1.09948	-0.872304	3.55e-48	7.97e-44	0.109	0.575
RILPL2	0.0559189	1.14109	-1.01985	4.19e-48	9.39e-44	0.039	0.408
TCIRG1	0.0199444	0.611287	-0.659723	4.22e-48	9.47e-44	0.024	0.358
LST1	0.0311018	0.934552	-0.907813	5.9e-48	1.32e-43	0.031	0.358
RPL18	12.9995	5.23641	1.16659	6.25e-48	1.4e-43	0.974	0.95
C5orf4	0.203577	2.02927	-1.33164	7.04e-48	1.58e-43	0.148	0.542
DPYSL2	2.75202	8.67606	-1.36675	7.59e-48	1.7e-43	0.94	0.939
CERS2	0.420079	2.59953	-1.34184	7.67e-48	1.72e-43	0.316	0.62
FOLR2	0.000251821	1.85552	-1.51339	7.84e-48	1.76e-43	0	0.229
CD69	0.064512	1.87772	-1.43473	1.03e-47	2.32e-43	0.01	0.302
LITAF	0.691528	2.58851	-1.08506	1.08e-47	2.41e-43	0.415	0.855
DOCK4	0.121168	0.820466	-0.699306	1.26e-47	2.83e-43	0.304	0.693
RHOB	0.452017	1.74418	-0.918317	1.6e-47	3.6e-43	0.557	0.911
CD24	3.42405	0.333264	1.7304	1.72e-47	3.85e-43	0.834	0.508
BCL2A1	0.0573091	1.3313	-1.14074	1.75e-47	3.92e-43	0.007	0.291
CDK4	2.38503	0.425597	1.2476	1.75e-47	3.93e-43	0.807	0.408
NPC1	0.27148	1.53893	-0.997712	1.92e-47	4.32e-43	0.335	0.709
LPAR6	0.0340312	1.06676	-0.999092	1.95e-47	4.36e-43	0.085	0.402
SDC3	1.12037	0.218398	0.799333	2.05e-47	4.6e-43	0.785	0.268
LTC4S	0.00629785	0.649278	-0.712777	2.18e-47	4.88e-43	0.009	0.285
RPS6KA1	0.0228016	0.767077	-0.788839	2.28e-47	5.11e-43	0.031	0.352
MEGF11	0.714947	0.0528497	0.703864	3.16e-47	7.09e-43	0.604	0.073
SYNDIG1	0.186971	1.21629	-0.90086	3.18e-47	7.13e-43	0.196	0.659
NFIA	1.52174	0.357111	0.893879	4.07e-47	9.14e-43	0.928	0.559
RPLP1	34.2061	15.377	1.10416	5.28e-47	1.19e-42	0.99	0.966
CCND1	2.90909	0.402582	1.47875	7.84e-47	1.76e-42	0.781	0.296
SNHG16	3.01315	0.589611	1.33606	1.07e-46	2.4e-42	0.884	0.659
IER3	0.0328453	1.37684	-1.20242	1.24e-46	2.78e-42	0.05	0.341
NRXN1	0.728947	0.117763	0.629279	2.06e-46	4.62e-42	0.796	0.291
UGT8	1.52386	7.12831	-1.68733	2.99e-46	6.7e-42	0.943	0.989
GPR62	0.0129796	0.525566	-0.59074	3.93e-46	8.81e-42	0.018	0.324
CRYAB	5.80395	31.0018	-2.23371	4.71e-46	1.06e-41	0.268	0.492
PMP2	7.21512	1.79956	1.55308	5e-46	1.12e-41	0.882	0.43
GRN	1.12422	5.19316	-1.54374	5.43e-46	1.22e-41	0.487	0.765
GOLM1	1.22843	0.124253	0.987058	6.29e-46	1.41e-41	0.711	0.184
MTMR10	0.0960558	0.733592	-0.661443	8.03e-46	1.8e-41	0.206	0.598
SGK3	0.111717	0.683982	-0.599087	8.24e-46	1.85e-41	0.562	0.793
COTL1	0.979004	3.76193	-1.26677	1.23e-45	2.76e-41	0.572	0.503
TTLL7	0.0720361	0.743673	-0.701776	1.37e-45	3.08e-41	0.177	0.458
CERCAM	0.218821	1.55691	-1.06891	1.43e-45	3.2e-41	0.254	0.48
RPL36	7.989	2.12164	1.52586	1.75e-45	3.93e-41	0.905	0.771
HMOX1	0.0327665	0.952427	-0.918755	1.92e-45	4.3e-41	0.021	0.341
SH3BGRL3	1.39047	4.56808	-1.21989	2.47e-45	5.54e-41	0.66	0.905
MNDA	0.0133362	0.864563	-0.879724	2.62e-45	5.89e-41	0.006	0.263
TRIB2	1.655	0.227121	1.11343	2.62e-45	5.89e-41	0.602	0.078
SUSD3	0.0100853	0.810645	-0.842026	4.26e-45	9.55e-41	0.002	0.24
OSM	0.00346165	1.22272	-1.14734	6.48e-45	1.45e-40	0.004	0.24
UQCRH	8.72157	2.5225	1.46459	6.61e-45	1.48e-40	0.875	0.648
MRPS21	5.04535	1.1791	1.47209	7.24e-45	1.62e-40	0.847	0.464
PICALM	0.228453	1.0388	-0.730875	8.31e-45	1.86e-40	0.37	0.832
SECISBP2L	0.279782	1.09381	-0.710234	9.04e-45	2.03e-40	0.549	0.676
TMBIM1	0.455931	1.94296	-1.01533	1.08e-44	2.41e-40	0.292	0.777
UBA7	0.0357446	0.710502	-0.723751	1.09e-44	2.45e-40	0.043	0.385
DHCR24	0.694737	3.41971	-1.38289	1.31e-44	2.93e-40	0.441	0.52
BCHE	2.67516	0.476733	1.3154	1.57e-44	3.53e-40	0.712	0.19
CCR1	0.00876986	0.526777	-0.597892	1.65e-44	3.7e-40	0.007	0.274
CCT3	7.71002	2.4099	1.35295	1.92e-44	4.31e-40	0.933	0.693
LIMS1	0.214295	0.951626	-0.684558	2.09e-44	4.69e-40	0.807	0.894
POLD4	0.193379	1.00349	-0.747463	2.13e-44	4.77e-40	0.516	0.816
RNH1	1.25409	4.59201	-1.31082	2.29e-44	5.13e-40	0.546	0.799
FAM13C	0.166299	1.08525	-0.838283	2.74e-44	6.16e-40	0.287	0.469
TMEM156	0.0148391	0.78236	-0.812538	3.04e-44	6.82e-40	0.203	0.469
C12orf57	3.1236	0.838292	1.16554	4.22e-44	9.47e-40	0.828	0.374
FGF12	1.06338	0.0791095	0.935167	5.87e-44	1.32e-39	0.612	0.101
PFKP	0.748503	0.0838352	0.689975	6.25e-44	1.4e-39	0.56	0.056
PYCR1	0.822046	0.045938	0.800762	1e-43	2.25e-39	0.54	0.045
CLIC1	0.207259	2.67564	-1.60626	1.25e-43	2.8e-39	0.081	0.425
DDAH1	1.19655	0.0641452	1.04555	1.62e-43	3.63e-39	0.546	0.05
C21orf37	0.00912023	0.972405	-0.966858	1.75e-43	3.93e-39	0.013	0.274
GMFG	0.0287372	0.609227	-0.645494	2.53e-43	5.67e-39	0.004	0.246
NCF1	0.0119384	0.599364	-0.660377	2.75e-43	6.18e-39	0.007	0.263
FMNL3	0.126059	0.697665	-0.592269	3.4e-43	7.64e-39	0.331	0.536
TCEAL2	1.55898	0.204293	1.08738	7.86e-43	1.76e-38	0.586	0.078
COL4A5	0.0518307	0.588222	-0.59451	9.01e-43	2.02e-38	0.111	0.458
RPL18A	21.6599	8.50626	1.25319	9.27e-43	2.08e-38	0.975	0.966
CLEC5A	0.00735178	0.940854	-0.946124	9.75e-43	2.19e-38	0.004	0.24
P2RY13	0.0188067	1.24516	-1.13994	1.23e-42	2.75e-38	0.031	0.307
GLTP	0.913979	4.1872	-1.43838	1.28e-42	2.88e-38	0.868	0.927
GAS5	10.4271	2.11646	1.87449	1.3e-42	2.93e-38	0.86	0.559
MERTK	0.0374269	0.815049	-0.806999	1.52e-42	3.41e-38	0.068	0.369
TECR	2.12889	6.761	-1.31059	1.67e-42	3.75e-38	0.663	0.799
DPYSL5	0.237214	1.3667	-0.935782	1.67e-42	3.76e-38	0.611	0.771
GIMAP4	0.0046441	0.958874	-0.96334	2.23e-42	5e-38	0.005	0.235
CALM2	17.2783	39.4272	-1.1452	2.64e-42	5.93e-38	0.973	0.994
CPQ	0.114672	1.12343	-0.929776	4.65e-42	1.04e-37	0.066	0.458
GPC1	0.57898	0.0424547	0.599008	4.66e-42	1.05e-37	0.584	0.084
DAZAP2	2.11729	5.85901	-1.13771	7.8e-42	1.75e-37	0.702	0.933
TUBB	12.0332	3.66681	1.48168	1.08e-41	2.42e-37	0.946	0.832
RPL10A	23.808	9.38707	1.25602	1.38e-41	3.09e-37	0.973	0.922
ILF2	6.33718	1.83231	1.37325	1.75e-41	3.94e-37	0.891	0.654
NTRK3	0.829916	0.0480603	0.804056	1.85e-41	4.15e-37	0.515	0.039
MAPRE2	0.640085	2.46967	-1.08103	2.54e-41	5.71e-37	0.595	0.737
SGK2	0.0438317	0.679537	-0.686175	3.01e-41	6.76e-37	0.036	0.369
ABAT	0.899143	0.178722	0.688125	3.43e-41	7.7e-37	0.774	0.296
RPS2	20.1573	7.59926	1.29887	5.29e-41	1.19e-36	0.982	0.939
RPS18	46.4613	14.5079	1.61374	6.61e-41	1.48e-36	0.972	0.955
ELF1	0.118689	1.06559	-0.884746	6.98e-41	1.57e-36	0.17	0.57
KDM5B	0.628081	0.0670581	0.609534	9.45e-41	2.12e-36	0.69	0.201
SKAP2	0.0414073	0.652165	-0.665824	1.12e-40	2.51e-36	0.159	0.436
GSTA4	2.88747	0.438383	1.43438	1.52e-40	3.4e-36	0.663	0.162
DHRS3	0.155222	1.95807	-1.35648	1.6e-40	3.58e-36	0.051	0.397
GRIA2	1.3072	0.249693	0.884571	1.63e-40	3.66e-36	0.803	0.352
PCDH9	1.22383	3.40739	-0.986882	1.9e-40	4.27e-36	0.618	0.542
TLR1	0.00789688	0.631131	-0.694525	2.5e-40	5.62e-36	0.013	0.251
TSPAN13	1.28425	0.0686173	1.09597	2.82e-40	6.33e-36	0.486	0.028
NDRG4	1.17837	0.102604	0.982331	3.36e-40	7.53e-36	0.609	0.123
LINC00320	0.0106269	0.656079	-0.712521	4.28e-40	9.61e-36	0.019	0.291
RASGEF1B	0.166971	1.95149	-1.33867	4.32e-40	9.7e-36	0.136	0.453
FXYD5	0.0717466	1.25121	-1.07074	5.04e-40	1.13e-35	0.038	0.346
PSEN1	0.29802	1.32457	-0.840652	5.11e-40	1.15e-35	0.414	0.749
HMP19	0.948364	0.102585	0.821373	5.63e-40	1.26e-35	0.491	0.034
RPS17	10.6418	3.51639	1.36607	8.04e-40	1.8e-35	0.946	0.922
RPS17L	10.6418	3.51639	1.36607	8.04e-40	1.8e-35	0.946	0.922
NXPH1	1.55549	0.0381486	1.29959	8.47e-40	1.9e-35	0.483	0.034
CHGB	1.07221	0.057591	0.970388	9.04e-40	2.03e-35	0.482	0.028
RPL32	5.02847	1.78165	1.11585	1.37e-39	3.08e-35	0.963	0.927
RPS15A	15.9845	7.58946	0.983576	1.4e-39	3.13e-35	0.957	0.95
HIST3H2A	1.16599	0.0852693	0.996971	1.47e-39	3.29e-35	0.566	0.089
LYZ	0.279019	18.8418	-3.95543	1.77e-39	3.97e-35	0.802	0.883
HERPUD1	1.19834	6.5347	-1.77713	1.96e-39	4.4e-35	0.432	0.726
NKAIN2	0.111369	1.21989	-0.998152	2.07e-39	4.65e-35	0.124	0.436
PLS3	0.106607	1.12045	-0.938226	2.27e-39	5.1e-35	0.045	0.391
GRIA4	1.54839	0.477772	0.786165	2.42e-39	5.43e-35	0.863	0.425
PAFAH1B3	2.64881	0.57934	1.20811	2.83e-39	6.36e-35	0.661	0.162
H2AFY2	0.749097	0.0871201	0.686099	3.38e-39	7.58e-35	0.536	0.061
FMNL2	0.242496	1.12707	-0.775628	3.38e-39	7.59e-35	0.413	0.754
SYPL1	1.11537	5.69724	-1.66265	3.64e-39	8.16e-35	0.325	0.693
B3GNT5	0.151066	2.14839	-1.45164	4.41e-39	9.89e-35	0.102	0.391
SFT2D1	1.3867	4.89356	-1.30412	5.46e-39	1.22e-34	0.427	0.793
GM2A	0.244395	1.00699	-0.689591	6.32e-39	1.42e-34	0.549	0.799
RPL15	24.8774	9.96458	1.23884	6.68e-39	1.5e-34	0.998	1
ATAT1	1.66752	0.275994	1.06388	7.13e-39	1.6e-34	0.746	0.313
RPL4	36.6527	15.4422	1.19536	2.94e-38	6.59e-34	0.989	1
HRASLS	0.784176	0.0403849	0.77814	3.03e-38	6.79e-34	0.447	0.017
RASSF4	0.504668	1.63569	-0.808734	3.18e-38	7.13e-34	0.264	0.749
PXK	0.521147	2.53253	-1.21554	4.95e-38	1.11e-33	0.342	0.615
ASTN1	0.990638	0.208972	0.71945	5.04e-38	1.13e-33	0.783	0.335
HMGN1	6.25069	2.36652	1.10686	5.44e-38	1.22e-33	0.912	0.754
RAN	9.63215	3.74508	1.16393	5.54e-38	1.24e-33	0.921	0.754
BST2	0.0680232	0.956362	-0.87323	5.88e-38	1.32e-33	0.029	0.335
RPS15	15.3996	7.42118	0.961562	5.9e-38	1.32e-33	0.97	0.978
ANXA6	1.22641	0.239623	0.844819	8.09e-38	1.82e-33	0.639	0.151
RAB20	0.04189	1.06155	-0.984524	8.17e-38	1.83e-33	0.029	0.302
RPS19	11.7732	5.6741	0.936472	9.11e-38	2.04e-33	0.974	0.944
CPVL	0.304695	3.20481	-1.68833	2.07e-37	4.64e-33	0.106	0.419
ENPP6	0.124227	1.04104	-0.860373	2.66e-37	5.96e-33	0.223	0.52
OPALIN	0.0173463	2.3047	-1.69971	3.04e-37	6.82e-33	0.007	0.207
SET	4.5847	1.83306	0.97912	3.07e-37	6.88e-33	0.966	0.905
NGRN	4.47841	1.35257	1.21952	3.11e-37	6.98e-33	0.858	0.492
HLA-C	1.92617	6.2879	-1.31649	3.13e-37	7.03e-33	0.715	0.877
NFKBIA	1.07705	5.85577	-1.72278	3.62e-37	8.13e-33	0.384	0.609
LGALS3BP	1.50035	4.20292	-1.05719	4.62e-37	1.04e-32	0.534	0.531
RTN1	3.8198	0.792261	1.42719	5.12e-37	1.15e-32	0.745	0.324
EPHB1	0.550297	0.0154587	0.610413	7.41e-37	1.66e-32	0.467	0.034
RPS4X	40.3369	17.9385	1.1261	7.74e-37	1.74e-32	0.988	0.955
MPZL1	1.71171	0.385685	0.968603	8.57e-37	1.92e-32	0.752	0.285
EGFR	0.784316	0.00836928	0.823347	9.29e-37	2.08e-32	0.443	0.022
RPL31	21.1661	9.11015	1.13255	1e-36	2.25e-32	0.969	0.955
TCF12	3.8776	0.81794	1.42387	1.08e-36	2.42e-32	0.883	0.749
DLL3	0.629384	0.0801721	0.593065	1.25e-36	2.82e-32	0.466	0.034
CNPY3	0.806153	2.64452	-1.01281	1.29e-36	2.9e-32	0.525	0.659
CBR1	1.66744	6.10644	-1.41367	1.35e-36	3.02e-32	0.57	0.631
EDIL3	0.504986	2.45309	-1.19814	2.07e-36	4.63e-32	0.288	0.508
CDR1	2.90869	0.809558	1.11105	2.14e-36	4.8e-32	0.813	0.369
PFN2	6.03556	2.00294	1.22829	2.74e-36	6.14e-32	0.863	0.441
ACTG1	41.5287	24.562	0.734436	3.01e-36	6.76e-32	0.999	1
NAV1	0.738811	0.145899	0.601621	3.04e-36	6.83e-32	0.887	0.559
GCA	0.250074	1.1336	-0.771274	3.63e-36	8.14e-32	0.19	0.637
RPS7	10.7092	4.14622	1.18605	4.09e-36	9.18e-32	0.942	0.911
CNN3	4.82248	1.42949	1.26098	4.95e-36	1.11e-31	0.845	0.425
RGS2	1.36201	8.24778	-1.96909	5.26e-36	1.18e-31	0.323	0.492
RFFL	0.10413	0.782689	-0.691145	5.83e-36	1.31e-31	0.121	0.492
GRIA3	0.922631	0.154204	0.736183	7.39e-36	1.66e-31	0.682	0.212
EIF1	12.1851	22.438	-0.829934	8.41e-36	1.89e-31	0.975	1
SULT1C4	0.69824	0.0224207	0.732052	8.57e-36	1.92e-31	0.448	0.028
LINC00673	0.989301	0.12554	0.821644	9.32e-36	2.09e-31	0.617	0.156
GNG7	0.315564	1.11499	-0.68497	1.37e-35	3.08e-31	0.426	0.804
SCIN	0.114345	1.36679	-1.08674	1.5e-35	3.38e-31	0.102	0.402
LOC254559	0.561147	0.0103045	0.627817	1.99e-35	4.46e-31	0.459	0.039
GNG2	0.94552	0.229744	0.661798	3.26e-35	7.31e-31	0.591	0.123
ZNF536	0.0805978	0.641712	-0.603372	5.01e-35	1.12e-30	0.14	0.436
HEPN1	3.53558	6.89841	-0.800275	5.99e-35	1.34e-30	0.678	0.52
LY96	0.0131658	0.790262	-0.8213	7.39e-35	1.66e-30	0.003	0.196
RPS27	27.3368	11.8592	1.13987	9.07e-35	2.03e-30	0.978	0.972
NME4	0.677562	0.0647743	0.655819	1.1e-34	2.47e-30	0.529	0.084
RPS3A	42.3581	16.9612	1.27142	1.46e-34	3.28e-30	0.99	0.978
UCHL1	5.48734	2.63498	0.835679	1.6e-34	3.59e-30	0.837	0.402
MCM7	1.93836	0.263848	1.21719	1.69e-34	3.78e-30	0.674	0.218
MOSPD2	0.151696	1.18576	-0.924375	2.08e-34	4.68e-30	0.125	0.469
C2	0.0169276	0.672385	-0.71769	2.22e-34	4.97e-30	0.02	0.257
HLA-B	2.65198	9.77952	-1.56154	2.56e-34	5.75e-30	0.742	0.866
NAGA	0.191484	1.14338	-0.84713	2.64e-34	5.93e-30	0.243	0.525
SLC44A1	0.652958	1.90144	-0.81172	3.19e-34	7.15e-30	0.648	0.62
TAGLN3	1.41654	0.212941	0.994431	3.62e-34	8.12e-30	0.593	0.134
GNA13	0.22744	1.27064	-0.887446	4.04e-34	9.07e-30	0.31	0.603
TGOLN2	0.555156	1.48067	-0.67367	4.33e-34	9.71e-30	0.734	0.916
GAP43	0.792402	0.0718698	0.741764	4.47e-34	1e-29	0.42	0.022
PID1	0.969741	0.121106	0.813083	4.7e-34	1.06e-29	0.468	0.045
NCBP2	3.00338	0.643803	1.28418	5.77e-34	1.3e-29	0.763	0.374
SQSTM1	0.55964	1.83988	-0.864617	6.04e-34	1.36e-29	0.468	0.81
MAP6D1	0.0574548	0.732664	-0.712396	6.59e-34	1.48e-29	0.061	0.369
ENAH	0.748891	0.142258	0.614552	6.98e-34	1.57e-29	0.965	0.894
DNAJC6	0.1716	0.876359	-0.679456	8.44e-34	1.89e-29	0.302	0.492
DBI	17.2431	6.57169	1.26867	9.68e-34	2.17e-29	0.961	0.877
LSP1	0.0275072	0.893426	-0.881851	9.69e-34	2.17e-29	0.011	0.235
RCN2	3.75774	0.961601	1.27824	9.87e-34	2.22e-29	0.796	0.385
REL	0.168471	1.00474	-0.778793	9.99e-34	2.24e-29	0.557	0.687
ENO1	8.3859	3.79047	0.97033	1.07e-33	2.39e-29	0.952	0.894
TSPAN6	1.55616	0.29659	0.979253	1.15e-33	2.59e-29	0.527	0.084
LMBRD1	0.683045	2.43231	-1.0281	1.31e-33	2.94e-29	0.455	0.771
GNB2L1	36.9583	13.7164	1.36699	1.36e-33	3.04e-29	0.981	0.972
AP1B1	0.359441	1.39226	-0.815364	1.5e-33	3.37e-29	0.496	0.704
RASSF5	0.0467524	0.750754	-0.742056	1.76e-33	3.96e-29	0.041	0.318
NR4A1	1.38885	5.11244	-1.35543	1.83e-33	4.1e-29	0.509	0.458
HSP90AB1	17.3688	8.50517	0.950476	2.56e-33	5.75e-29	0.981	0.961
PYCARD	0.117239	1.44046	-1.12722	2.65e-33	5.94e-29	0.073	0.318
ETS2	0.32213	1.56269	-0.954795	3.8e-33	8.53e-29	0.335	0.447
NEDD9	0.139708	1.28914	-1.00614	4.04e-33	9.06e-29	0.129	0.419
RPL41	42.9159	20.6575	1.01987	5.18e-33	1.16e-28	0.996	0.989
PCP4	3.11016	0.0164939	2.01559	5.7e-33	1.28e-28	0.394	0.017
RPL24	9.20637	4.08582	1.00492	5.88e-33	1.32e-28	0.944	0.888
TOMM20	4.63745	1.50406	1.17077	5.89e-33	1.32e-28	0.902	0.726
H3F3AP4	15.5852	5.49952	1.35149	6.08e-33	1.36e-28	0.907	0.844
MYL6B	0.836874	0.117042	0.717569	7.11e-33	1.6e-28	0.598	0.162
CYTH1	0.3353	1.18909	-0.713168	7.15e-33	1.6e-28	0.389	0.771
RPL8	23.1014	10.1839	1.10769	1.11e-32	2.48e-28	0.967	0.978
PHLDA1	1.53413	0.309998	0.951926	1.21e-32	2.71e-28	0.868	0.615
LOC284454	0.265682	1.33005	-0.880443	1.26e-32	2.83e-28	0.698	0.821
OSBPL1A	0.282272	1.54898	-0.991219	1.3e-32	2.93e-28	0.289	0.575
FIS1	2.64362	6.24825	-0.992262	1.43e-32	3.21e-28	0.729	0.715
RPL39	15.365	6.02808	1.21941	1.54e-32	3.46e-28	0.927	0.816
RNF13	1.55048	4.72243	-1.16586	1.94e-32	4.35e-28	0.627	0.771
APBB1	1.61352	3.59689	-0.814667	2.06e-32	4.62e-28	0.676	0.559
SPON1	0.990554	0.0303771	0.949997	2.09e-32	4.7e-28	0.433	0.034
DANCR	3.9145	0.678678	1.54972	2.12e-32	4.76e-28	0.681	0.24
MAN2B1	0.227291	1.232	-0.862862	2.8e-32	6.28e-28	0.257	0.536
RAP1GDS1	0.550842	2.02327	-0.963056	3.28e-32	7.35e-28	0.504	0.659
PLK3	0.0865305	0.943588	-0.838994	3.31e-32	7.44e-28	0.101	0.402
CPE	1.0954	0.285226	0.705206	3.34e-32	7.5e-28	0.568	0.123
UGDH	2.04715	0.276534	1.25523	4.67e-32	1.05e-27	0.796	0.609
CD164	0.985182	2.91936	-0.981347	4.83e-32	1.08e-27	0.374	0.799
FUT8	0.166825	0.859483	-0.672313	4.96e-32	1.11e-27	0.235	0.57
SULF2	0.818833	0.0874899	0.742011	5.42e-32	1.22e-27	0.539	0.106
FGR	0.0120886	0.566829	-0.630512	5.54e-32	1.24e-27	0.008	0.218
SH3BGRL	1.45734	4.36525	-1.12655	5.81e-32	1.3e-27	0.505	0.827
RPS11	20.4591	9.97238	0.967714	7.2e-32	1.61e-27	0.989	0.972
RAP1A	0.262949	1.27253	-0.847506	7.56e-32	1.7e-27	0.184	0.581
GPR17	1.39916	0.185252	1.01734	8.49e-32	1.9e-27	0.487	0.067
RPL7	39.082	17.7781	1.09391	8.84e-32	1.98e-27	0.99	0.978
SCAMP2	0.629228	2.0469	-0.903152	9.89e-32	2.22e-27	0.378	0.765
TTC3	1.76428	0.639531	0.75362	1.08e-31	2.42e-27	0.956	0.866
RFX4	0.808838	0.00171117	0.852596	1.15e-31	2.57e-27	0.452	0.061
RPS8	32.643	13.8868	1.17627	1.32e-31	2.95e-27	0.977	0.961
RBP7	0.0159019	0.590377	-0.646607	1.32e-31	2.96e-27	0.007	0.207
MOB3B	0.126439	0.72134	-0.611763	1.57e-31	3.52e-27	0.17	0.508
TIMP4	1.16232	0.132385	0.933214	1.78e-31	3.99e-27	0.447	0.045
METTL7A	0.208039	0.842083	-0.608671	1.84e-31	4.13e-27	0.498	0.754
FCGR1C	0.00620132	0.655672	-0.718498	1.86e-31	4.17e-27	0.024	0.229
ATCAY	0.958034	0.118524	0.80781	2.06e-31	4.61e-27	0.941	0.894
ID2	5.72635	16.0422	-1.34122	2.06e-31	4.61e-27	0.719	0.525
PDE1A	0.0610971	0.634852	-0.623603	2.19e-31	4.92e-27	0.047	0.341
LRRN3	1.54518	0.0704307	1.24957	2.37e-31	5.31e-27	0.501	0.089
CNRIP1	2.12022	0.47226	1.08362	2.81e-31	6.31e-27	0.723	0.302
CDC42EP4	1.08795	0.0639296	0.972682	2.85e-31	6.39e-27	0.49	0.078
ZFP36L1	1.1421	2.36168	-0.650156	2.97e-31	6.67e-27	0.752	0.514
RASSF2	0.716674	2.09552	-0.850566	6.2e-31	1.39e-26	0.63	0.86
SLC29A1	0.331936	1.51716	-0.918271	6.54e-31	1.47e-26	0.271	0.391
CTSH	0.418118	2.69522	-1.38168	7.74e-31	1.74e-26	0.136	0.425
ACTB	44.4239	74.1512	-0.726345	9.72e-31	2.18e-26	1	1
CCL3L1	0.0262215	4.68824	-2.47064	1.15e-30	2.58e-26	0.002	0.168
HTRA1	0.521638	1.54331	-0.741083	1.21e-30	2.71e-26	0.301	0.732
LGMN	0.522377	2.1405	-1.04467	1.25e-30	2.8e-26	0.605	0.793
EFHD1	0.175386	1.2099	-0.910849	1.28e-30	2.87e-26	0.09	0.43
PLLP	1.45765	7.06588	-1.71455	1.7e-30	3.81e-26	0.267	0.486
EEF2	9.87383	4.58469	0.96131	1.8e-30	4.03e-26	0.994	0.972
PCSK1N	0.855985	0.16388	0.673242	1.83e-30	4.1e-26	0.613	0.179
CLDN12	0.582351	0.0537279	0.586567	2.38e-30	5.34e-26	0.457	0.056
PARK7	6.70391	2.91007	0.978395	3.53e-30	7.92e-26	0.907	0.737
CHST9	0.530563	0	0.614062	3.57e-30	8e-26	0.32	0
VPS45	1.44422	0.213459	1.01025	3.66e-30	8.21e-26	0.658	0.263
HNRNPC	5.24655	3.00492	0.641286	4.79e-30	1.07e-25	0.967	0.966
LSM7	2.4246	0.663296	1.04189	4.92e-30	1.1e-25	0.742	0.352
OLIG1	3.72011	1.08073	1.18173	5.02e-30	1.13e-25	0.856	0.536
NLGN4X	0.743647	0.126802	0.629873	5.6e-30	1.26e-25	0.635	0.212
PLEKHO2	0.0840292	0.67328	-0.626275	6.08e-30	1.37e-25	0.17	0.458
SCPEP1	0.643833	2.73879	-1.18551	1.06e-29	2.38e-25	0.288	0.575
ENG	0.118233	0.801768	-0.688192	1.08e-29	2.42e-25	0.175	0.369
APP	1.08662	2.33392	-0.676049	1.12e-29	2.52e-25	0.751	0.637
RPS13	28.2894	12.4288	1.12505	1.15e-29	2.57e-25	0.975	0.95
NME2	6.84412	2.62668	1.11296	1.21e-29	2.71e-25	0.869	0.665
CFL2	0.781286	2.49442	-0.972133	1.24e-29	2.79e-25	0.39	0.503
NCF2	0.0506591	0.887478	-0.845165	1.3e-29	2.92e-25	0.046	0.291
RPL5	47.796	21.409	1.12268	1.35e-29	3.04e-25	0.993	0.994
HES6	1.28634	0.0959196	1.0609	1.43e-29	3.21e-25	0.505	0.106
PFKM	1.01794	0.17422	0.781183	1.55e-29	3.47e-25	0.609	0.19
ATP2B4	0.884465	0.133798	0.732991	2.04e-29	4.57e-25	0.721	0.346
RPL3	45.492	19.1974	1.20282	2.31e-29	5.19e-25	0.993	0.983
MYL12A	1.03112	3.09893	-1.01297	2.63e-29	5.9e-25	0.509	0.771
ZNF331	0.307473	1.84903	-1.12369	3e-29	6.74e-25	0.479	0.676
HHATL	0.00922128	0.785807	-0.823333	3.23e-29	7.25e-25	0.017	0.201
RHBDL2	0.0711176	0.612802	-0.590452	3.25e-29	7.28e-25	0.419	0.665
GLIPR1	0.135278	0.838234	-0.695275	3.32e-29	7.46e-25	0.156	0.391
RPS3	16.9893	7.17762	1.13738	3.67e-29	8.24e-25	0.984	0.994
RCAN2	0.146891	0.863878	-0.70058	3.84e-29	8.62e-25	0.076	0.402
PPAP2C	0.56579	2.75582	-1.26224	6.41e-29	1.44e-24	0.185	0.453
AFMID	0.379888	1.2273	-0.690746	6.91e-29	1.55e-24	0.752	0.844
GOLGA8A	1.10004	0.30749	0.683618	1.03e-28	2.3e-24	0.802	0.425
GNG12	0.909541	0.109576	0.783217	1.09e-28	2.46e-24	0.469	0.073
RPL7A	24.3967	10.7154	1.11624	1.25e-28	2.8e-24	0.974	0.944
LAPTM4B	1.3964	0.288934	0.894693	1.34e-28	3.01e-24	0.734	0.346
RPS21	7.53453	2.15637	1.43505	1.67e-28	3.74e-24	0.857	0.715
CTNNA1	1.04539	2.85632	-0.914849	2.36e-28	5.3e-24	0.553	0.821
SNRPD2	3.51196	1.15768	1.06427	2.5e-28	5.6e-24	0.783	0.514
S100A13	0.179988	1.17137	-0.879831	2.74e-28	6.14e-24	0.1	0.413
CBX3	3.38206	1.18285	1.00539	2.94e-28	6.59e-24	0.877	0.609
LNX1	1.17368	0.0598452	1.03628	3.32e-28	7.45e-24	0.464	0.084
CHN2	0.0972887	0.699814	-0.631434	3.98e-28	8.94e-24	0.087	0.397
SRGAP2C	0.812063	2.58729	-0.985262	4.44e-28	9.96e-24	0.596	0.816
RPL35	7.35333	3.42922	0.915301	4.67e-28	1.05e-23	0.888	0.877
RPL34	7.47232	2.6574	1.21194	5.55e-28	1.24e-23	0.933	0.894
CMTM7	0.0604385	0.72656	-0.70324	5.96e-28	1.34e-23	0.023	0.257
IGFBPL1	0.947123	0.0315737	0.916497	6.55e-28	1.47e-23	0.616	0.285
ATP6V0E2	2.69939	1.24729	0.719101	7.55e-28	1.69e-23	0.858	0.497
ENPP4	0.175308	0.99229	-0.761389	7.74e-28	1.74e-23	0.176	0.441
PAM	0.827726	0.206065	0.599742	8.03e-28	1.8e-23	0.529	0.123
TRIM9	1.23158	0.332009	0.744463	9.11e-28	2.04e-23	0.703	0.296
STRAP	5.16392	1.87041	1.10259	9.17e-28	2.06e-23	0.821	0.659
RAMP2	0.635173	0.0607235	0.624395	9.46e-28	2.12e-23	0.404	0.039
ATP5A1	7.62243	3.27726	1.01141	9.52e-28	2.14e-23	0.928	0.799
TPD52	0.227613	1.08457	-0.763893	9.96e-28	2.24e-23	0.213	0.492
CASP1	0.013713	0.591665	-0.650887	1.04e-27	2.34e-23	0.009	0.19
THBS1	0.133092	1.13981	-0.917217	1.16e-27	2.6e-23	0.178	0.056
NUDT10	0.761302	0.0538313	0.740998	1.32e-27	2.96e-23	0.341	0.011
CCT2	3.50117	1.04301	1.1396	1.4e-27	3.15e-23	0.802	0.492
ATP6V1E1	1.08624	3.13332	-0.986395	1.44e-27	3.22e-23	0.487	0.754
RPL22	3.61528	1.39813	0.944508	1.45e-27	3.25e-23	0.918	0.832
ARPC3	3.13903	7.81514	-1.09069	1.48e-27	3.33e-23	0.706	0.911
RGMB	0.813863	0.151778	0.655203	1.98e-27	4.44e-23	0.612	0.201
CST3	14.0126	5.38798	1.23275	2e-27	4.48e-23	0.86	0.492
EIF5A	4.93255	2.27684	0.856346	2.62e-27	5.88e-23	0.911	0.899
PALD1	0.0969463	0.70697	-0.637945	2.78e-27	6.24e-23	0.147	0.419
RPL6	25.6745	10.3476	1.23307	2.94e-27	6.61e-23	0.971	0.961
RPL36A	4.67379	1.69399	1.07457	3.87e-27	8.67e-23	0.912	0.749
CDKN1A	0.372201	2.22307	-1.23194	3.9e-27	8.75e-23	0.136	0.436
TMSB15A	1.76828	0.143364	1.27571	3.96e-27	8.89e-23	0.361	0.022
ILF3	2.15651	0.914828	0.721115	3.99e-27	8.96e-23	0.945	0.855
OCIAD2	1.19442	0.14055	0.94411	4.26e-27	9.56e-23	0.428	0.056
ENDOD1	0.251189	1.24035	-0.840422	4.33e-27	9.71e-23	0.255	0.503
BOK	0.155852	1.01472	-0.801621	4.35e-27	9.77e-23	0.135	0.413
LINC00643	1.07322	0.170106	0.825236	5.9e-27	1.32e-22	0.727	0.43
SCRG1	6.21984	2.73596	0.950488	6.61e-27	1.48e-22	0.832	0.464
UFC1	3.3492	1.02461	1.10311	7.46e-27	1.67e-22	0.794	0.503
STXBP3	0.587858	2.11728	-0.973204	8.53e-27	1.91e-22	0.33	0.637
CHL1	0.63162	0.0715821	0.606563	8.61e-27	1.93e-22	0.406	0.045
MPP1	0.179379	0.985525	-0.751493	8.67e-27	1.95e-22	0.121	0.453
TMEM9	2.56271	0.849994	0.945453	1.06e-26	2.38e-22	0.787	0.408
ATP1B1	1.81686	4.51164	-0.968391	1.4e-26	3.15e-22	0.748	0.726
TPM2	0.837146	0.173565	0.646568	1.57e-26	3.53e-22	0.457	0.078
SFXN1	1.35023	0.219811	0.946142	1.66e-26	3.73e-22	0.825	0.659
ALKBH2	1.40704	0.268221	0.924456	1.7e-26	3.8e-22	0.545	0.145
GLRX	0.251286	1.8521	-1.18861	2.47e-26	5.53e-22	0.131	0.346
CNDP2	0.607734	1.54411	-0.662135	2.52e-26	5.65e-22	0.564	0.816
LARP6	0.183846	1.30649	-0.962221	2.85e-26	6.4e-22	0.114	0.408
VIPR2	0.681701	0.0166966	0.726032	3.14e-26	7.04e-22	0.634	0.38
ZCCHC6	0.159037	0.78295	-0.62134	3.67e-26	8.24e-22	0.312	0.609
RPS24	13.5508	7.32954	0.80479	4.4e-26	9.87e-22	0.982	0.966
PCDHGC4	0.615058	0.047505	0.624629	4.7e-26	1.05e-21	0.416	0.056
CHCHD2	9.27364	4.81933	0.820022	4.83e-26	1.08e-21	0.943	0.838
NT5DC2	0.795676	0.0753263	0.739753	5.21e-26	1.17e-21	0.469	0.101
BEX2	2.83681	0.797391	1.094	7.24e-26	1.62e-21	0.663	0.268
NPDC1	1.53817	0.543233	0.717834	7.33e-26	1.64e-21	0.692	0.285
RPS14	25.5632	12.1944	1.0095	7.98e-26	1.79e-21	0.973	0.978
PSMB10	0.200081	0.89406	-0.65835	9.43e-26	2.11e-21	0.254	0.492
NPL	0.0775487	0.69393	-0.652621	9.79e-26	2.2e-21	0.07	0.335
FIP1L1	2.13509	0.458331	1.10419	1.06e-25	2.37e-21	0.708	0.341
LIMCH1	0.28671	1.02139	-0.651659	1.06e-25	2.38e-21	0.334	0.486
MKNK1	0.137533	0.947125	-0.775437	1.45e-25	3.26e-21	0.174	0.453
JAM3	0.768876	1.70582	-0.613235	1.56e-25	3.49e-21	0.627	0.531
SUSD4	0.595371	0.0129704	0.6553	1.64e-25	3.69e-21	0.333	0.017
RAB4B	0.276018	1.16741	-0.764321	1.91e-25	4.29e-21	0.182	0.514
RPS25	27.1333	11.8104	1.13496	2e-25	4.48e-21	0.981	0.978
RPS23	4.03583	1.66758	0.9167	2.25e-25	5.05e-21	0.967	0.95
PLBD1	0.0231413	1.53317	-1.30794	2.64e-25	5.93e-21	0.023	0.207
ACER3	0.263347	0.988583	-0.65449	2.72e-25	6.1e-21	0.258	0.615
RPL38	11.3346	5.6808	0.884622	2.82e-25	6.34e-21	0.935	0.922
PRR13	0.522326	1.55628	-0.747767	2.96e-25	6.64e-21	0.358	0.709
C16orf45	1.38362	0.552285	0.618759	3.08e-25	6.91e-21	0.683	0.279
RPS27A	15.2413	9.10965	0.683931	3.59e-25	8.05e-21	0.984	0.966
COL9A1	2.36484	0.270778	1.40483	3.84e-25	8.62e-21	0.504	0.128
IMPDH2	3.54606	1.19017	1.05358	3.85e-25	8.65e-21	0.796	0.497
ST3GAL4	0.0701199	0.638289	-0.614417	4.11e-25	9.21e-21	0.056	0.302
CAPZB	1.06501	2.50304	-0.762458	4.11e-25	9.23e-21	0.772	0.877
RPL13	4.37635	2.05644	0.814775	4.54e-25	1.02e-20	0.986	0.994
CHAD	1.00058	0.086714	0.880444	4.79e-25	1.07e-20	0.367	0.034
KCNIP4	0.711935	0.0279357	0.735878	4.88e-25	1.09e-20	0.344	0.022
MIS18BP1	0.14495	0.810961	-0.661471	5.01e-25	1.12e-20	0.225	0.464
PRAME	1.62814	0.0277709	1.35453	5.55e-25	1.25e-20	0.314	0.011
SUMO2	10.2451	5.2842	0.839499	7.83e-25	1.76e-20	0.961	0.888
RPAIN	1.43586	0.464199	0.734322	8.86e-25	1.99e-20	0.775	0.458
ANKS1B	0.842407	1.88348	-0.646221	1.07e-24	2.4e-20	0.562	0.525
CRISPLD1	0.670388	0.0748257	0.636081	1.26e-24	2.84e-20	0.386	0.045
SRP9	12.9586	5.79831	1.03791	1.84e-24	4.13e-20	0.935	0.793
HSPD1	4.17071	1.76818	0.901424	1.98e-24	4.44e-20	0.896	0.754
ID1	2.06361	0.317695	1.21721	1.99e-24	4.46e-20	0.457	0.089
ATF3	0.419821	1.45453	-0.789736	2.03e-24	4.57e-20	0.159	0.514
RPLP2	15.7124	7.47281	0.980008	2.04e-24	4.58e-20	0.961	0.927
CRIP2	1.26571	0.356792	0.739764	2.14e-24	4.81e-20	0.463	0.095
CDH2	0.816129	0.21012	0.585717	2.83e-24	6.36e-20	0.688	0.307
GNAI1	1.29648	3.09343	-0.833885	2.99e-24	6.72e-20	0.498	0.508
GFPT2	0.570499	0.0218045	0.620104	3.34e-24	7.48e-20	0.363	0.039
BTBD17	0.829653	0.0259218	0.834649	3.35e-24	7.53e-20	0.355	0.034
LIMA1	1.52983	0.365909	0.889181	3.42e-24	7.68e-20	0.695	0.341
LPXN	0.0948073	0.683339	-0.620649	3.54e-24	7.95e-20	0.108	0.38
TNFAIP3	0.106039	0.80193	-0.704141	4.59e-24	1.03e-19	0.11	0.358
SCARB2	0.865392	2.22623	-0.790372	4.76e-24	1.07e-19	0.768	0.927
PSMD4	4.64345	1.8831	0.968954	5.08e-24	1.14e-19	0.846	0.642
COX20	1.485	0.273142	0.964854	6.72e-24	1.51e-19	0.711	0.419
CRABP1	4.03066	0	2.33075	6.81e-24	1.53e-19	0.26	0
CXCR4	1.88911	10.4723	-1.98945	6.87e-24	1.54e-19	0.164	0.458
DYNC1I1	0.133523	0.826194	-0.688026	7.08e-24	1.59e-19	0.14	0.374
SLC1A2	0.63389	0.0727078	0.607053	8.08e-24	1.81e-19	0.659	0.346
RPL35A	9.6733	4.64282	0.919519	8.47e-24	1.9e-19	0.93	0.911
APOE	2.29077	8.60144	-1.54483	8.94e-24	2.01e-19	0.115	0.419
BTF3	10.9486	5.13473	0.961764	9.44e-24	2.12e-19	0.936	0.894
COL4A1	0.0559712	0.893383	-0.842395	1.05e-23	2.36e-19	0.11	0.039
NPM1	12.4761	6.05504	0.93368	1.31e-23	2.94e-19	0.952	0.905
IFITM2	0.414347	1.40257	-0.764445	1.55e-23	3.49e-19	0.084	0.38
TMEM98	0.802463	2.3508	-0.894536	1.56e-23	3.49e-19	0.376	0.419
SUSD5	0.674154	0.0989486	0.607308	2.62e-23	5.88e-19	0.545	0.19
PIK3IP1	0.389246	1.47366	-0.832346	3.2e-23	7.18e-19	0.194	0.525
LOC100216479	1.07131	0.100516	0.912363	3.22e-23	7.21e-19	0.656	0.374
REEP1	0.556953	0.0354497	0.588468	3.23e-23	7.25e-19	0.327	0.022
TM4SF1	1.78463	0.307761	1.09038	3.28e-23	7.35e-19	0.401	0.061
PPM1G	1.77037	0.601156	0.790967	3.39e-23	7.6e-19	0.745	0.408
EIF3L	8.64844	3.85058	0.992139	3.57e-23	8.02e-19	0.903	0.816
TMEM35	0.540668	0.000393296	0.622989	4.25e-23	9.53e-19	0.279	0.006
CCDC28B	0.829002	0.0918743	0.74425	4.98e-23	1.12e-18	0.404	0.067
B3GALNT1	1.00399	0.185654	0.757194	5.11e-23	1.15e-18	0.459	0.101
EIF3C	6.2107	2.70718	0.959815	5.3e-23	1.19e-18	0.938	0.899
KLRC2	2.37945	0.571515	1.10463	5.43e-23	1.22e-18	0.61	0.235
GNG4	0.640071	0.064029	0.624221	5.92e-23	1.33e-18	0.852	0.821
PPP2R1A	3.36283	1.55514	0.771861	6.57e-23	1.47e-18	0.91	0.732
FKBP5	0.202157	1.11097	-0.812279	7.3e-23	1.64e-18	0.61	0.737
RPL12	16.6379	7.40352	1.06961	7.43e-23	1.67e-18	0.93	0.927
PHYHIPL	3.24604	1.71456	0.645398	7.87e-23	1.77e-18	0.796	0.436
CD320	1.13314	0.193775	0.837446	9.64e-23	2.16e-18	0.472	0.117
FAM32A	3.07603	0.902577	1.09921	1.18e-22	2.65e-18	0.69	0.447
SRI	4.33189	1.70184	0.980706	1.19e-22	2.66e-18	0.873	0.682
RHOA	4.47514	7.87741	-0.697243	1.23e-22	2.76e-18	0.906	0.983
RNF2	1.17652	0.351692	0.687257	1.27e-22	2.84e-18	0.715	0.358
TRIB1	0.124833	0.722177	-0.614522	1.38e-22	3.1e-18	0.208	0.43
CTSC	0.588258	2.12664	-0.977166	1.43e-22	3.22e-18	0.916	0.944
MGAT1	0.227912	0.977938	-0.68779	1.49e-22	3.34e-18	0.238	0.52
GPNMB	0.0359498	1.10988	-1.02621	1.5e-22	3.38e-18	0.019	0.184
OAZ1	4.70752	8.79482	-0.779155	2.9e-22	6.5e-18	0.909	0.978
NACA	16.3189	9.21083	0.762244	3.02e-22	6.77e-18	0.969	0.966
RPS16	16.5485	8.7736	0.844388	3.46e-22	7.76e-18	0.965	0.944
C7orf50	1.69911	0.490311	0.856872	3.97e-22	8.9e-18	0.673	0.358
MRPS6	1.35118	0.243539	0.918932	4.5e-22	1.01e-17	0.476	0.123
STMN4	0.604528	1.59518	-0.693684	4.71e-22	1.06e-17	0.479	0.475
RPL11	20.1167	10.0633	0.932601	4.86e-22	1.09e-17	0.963	0.972
ZBTB20	1.77849	0.474021	0.914546	4.99e-22	1.12e-17	0.802	0.575
C8orf46	0.470142	1.9253	-0.99263	5e-22	1.12e-17	0.219	0.453
REEP3	0.337094	1.02377	-0.597942	5.14e-22	1.15e-17	0.527	0.743
NHP2	4.05099	1.60249	0.956673	5.38e-22	1.21e-17	0.801	0.564
CAP1	1.26471	2.83809	-0.761061	6.39e-22	1.43e-17	0.71	0.899
TMEM178A	0.251274	1.11692	-0.758568	6.53e-22	1.46e-17	0.235	0.346
MFAP2	0.582106	0.0533156	0.586909	6.8e-22	1.53e-17	0.313	0.022
TIMP3	0.678101	0.0276335	0.707504	6.81e-22	1.53e-17	0.347	0.039
TUBB2A	4.73737	1.42767	1.24082	7.17e-22	1.61e-17	0.725	0.391
WLS	0.971963	0.194756	0.722916	8.52e-22	1.91e-17	0.491	0.134
RPL9	31.6961	18.9388	0.713537	8.86e-22	1.99e-17	0.992	0.983
RBM4	3.71694	1.60911	0.854294	1.52e-21	3.41e-17	0.848	0.676
PAX3	0.641486	0.000207821	0.714703	1.66e-21	3.73e-17	0.26	0.006
GPATCH4	0.774392	0.176468	0.592863	1.72e-21	3.86e-17	0.579	0.223
PHB2	3.43405	1.27106	0.965262	2.17e-21	4.86e-17	0.792	0.536
TOMM5	3.02189	0.858043	1.11409	2.19e-21	4.92e-17	0.634	0.307
SLC35F1	0.834055	0.145795	0.678687	2.26e-21	5.06e-17	0.77	0.542
ATP1B2	0.645478	0.0954341	0.587004	2.51e-21	5.63e-17	0.749	0.492
ADAM10	0.424964	1.3075	-0.695407	2.68e-21	6.02e-17	0.392	0.682
ALAD	0.296708	1.11279	-0.704295	3.08e-21	6.91e-17	0.244	0.525
B4GALT3	0.991584	0.194247	0.737814	3.25e-21	7.3e-17	0.55	0.201
NOP16	1.14183	0.196196	0.840394	5.16e-21	1.16e-16	0.48	0.145
PCDH11X	0.859952	0.0822927	0.781174	5.51e-21	1.24e-16	0.85	0.737
PPAP2A	0.405174	1.68092	-0.931981	5.57e-21	1.25e-16	0.248	0.492
RPL37	1.82526	0.821968	0.632886	5.67e-21	1.27e-16	0.897	0.86
PLIN3	0.51592	1.94487	-0.958011	6.14e-21	1.38e-16	0.523	0.693
ST6GAL2	1.01535	0.0749346	0.906779	6.31e-21	1.42e-16	0.63	0.447
LINC00689	0.760073	0.0015676	0.813375	6.6e-21	1.48e-16	0.349	0.067
SNAP23	0.450011	1.44182	-0.75189	7.5e-21	1.68e-16	0.398	0.682
EXOSC4	1.4228	0.368515	0.824062	9.18e-21	2.06e-16	0.571	0.218
TNFSF18	0.00203098	0.65798	-0.726499	9.73e-21	2.18e-16	0.006	0.106
VMA21	1.10702	0.237847	0.767368	1.08e-20	2.43e-16	0.802	0.676
TNC	1.04866	0.00194637	1.03188	1.38e-20	3.11e-16	0.404	0.106
KLHL13	0.538086	0.00108268	0.619575	1.56e-20	3.5e-16	0.253	0.006
MKI67IP	1.48961	0.563309	0.671317	1.64e-20	3.68e-16	0.668	0.318
RAP1B	1.3708	2.97471	-0.745479	1.8e-20	4.05e-16	0.534	0.844
RPS28	12.7342	7.31439	0.724092	1.93e-20	4.34e-16	0.956	0.944
NCL	5.35261	2.91687	0.697648	2.19e-20	4.92e-16	0.961	0.877
KLHL7	1.49989	0.352196	0.886561	2.84e-20	6.37e-16	0.57	0.223
IP6K2	2.75642	0.981582	0.922706	2.96e-20	6.65e-16	0.75	0.458
COA6	1.16026	0.169503	0.88531	2.97e-20	6.66e-16	0.462	0.145
RPL14	7.02402	3.84582	0.727584	3.33e-20	7.47e-16	0.918	0.883
IFIT2	0.155084	0.764523	-0.611281	3.49e-20	7.83e-16	0.089	0.346
TMEM97	0.743473	0.140915	0.611773	3.87e-20	8.69e-16	0.429	0.101
CD47	1.15099	2.63052	-0.755178	4.13e-20	9.27e-16	0.747	0.749
TSPAN7	6.51864	2.27838	1.19749	4.51e-20	1.01e-15	0.764	0.464
RGR	0.565152	0.00088324	0.645029	4.61e-20	1.03e-15	0.281	0.022
PLIN2	0.257951	1.75392	-1.13041	5.08e-20	1.14e-15	0.176	0.391
RBM8A	1.44721	0.544717	0.663793	5.13e-20	1.15e-15	0.875	0.693
LGALS1	0.539829	2.79204	-1.3002	5.79e-20	1.3e-15	0.198	0.447
CCNE2	0.257141	1.21918	-0.819878	6.75e-20	1.51e-15	0.131	0.408
PDLIM5	1.38332	0.42709	0.739896	6.89e-20	1.55e-15	0.934	0.899
DDIT3	0.728297	2.34981	-0.954729	8.31e-20	1.86e-15	0.249	0.575
HSBP1	5.03075	2.49151	0.788485	9.18e-20	2.06e-15	0.925	0.754
WSB1	2.2007	3.80723	-0.586817	9.79e-20	2.2e-15	0.868	0.983
BLVRA	1.26092	0.288911	0.810759	1.22e-19	2.73e-15	0.461	0.128
SLC6A9	0.296744	1.01057	-0.632714	1.24e-19	2.78e-15	0.315	0.458
RGS19	0.186529	0.921929	-0.695808	1.26e-19	2.83e-15	0.135	0.318
RUVBL2	1.89448	0.586755	0.867225	1.72e-19	3.86e-15	0.659	0.341
DNER	1.59531	0.690506	0.618452	1.88e-19	4.23e-15	0.726	0.385
DAGLB	0.222215	0.870414	-0.613859	1.9e-19	4.26e-15	0.265	0.475
HNRNPK	8.47723	5.23463	0.604163	1.9e-19	4.26e-15	0.987	0.978
C1QBP	3.95061	1.69098	0.879476	2.04e-19	4.58e-15	0.797	0.642
LRRC4C	0.819094	0.210235	0.587932	2.17e-19	4.86e-15	0.576	0.229
TROVE2	3.1405	1.1546	0.942386	2.18e-19	4.89e-15	0.837	0.575
CAPZA1	1.36236	3.10429	-0.796906	2.23e-19	5e-15	0.687	0.877
UBC	14.7818	23.8938	-0.657522	2.46e-19	5.51e-15	0.961	1
GNG3	0.875881	0.0205905	0.878165	2.48e-19	5.57e-15	0.292	0.034
POLD2	1.64101	0.603442	0.719919	2.68e-19	6.01e-15	0.656	0.307
RPL26	21.1835	10.2967	0.973588	2.99e-19	6.72e-15	0.941	0.939
H3F3B	17.6155	10.8129	0.656145	3.38e-19	7.59e-15	0.989	1
BZW2	1.67884	0.450079	0.885479	3.63e-19	8.14e-15	0.566	0.229
RPL30	17.5777	9.88226	0.771591	3.97e-19	8.9e-15	0.971	0.989
RTN4	1.38171	3.13149	-0.794664	4.36e-19	9.79e-15	0.848	0.877
CYP27A1	0.39174	1.23348	-0.682406	4.6e-19	1.03e-14	0.239	0.553
PRKACB	1.43082	2.90327	-0.683239	5.9e-19	1.32e-14	0.709	0.754
DYNC1I2	0.889107	2.15008	-0.737684	6.46e-19	1.45e-14	0.722	0.76
LUC7L3	2.84611	1.40049	0.680069	7.05e-19	1.58e-14	0.937	0.838
JOSD2	0.29874	1.08822	-0.68516	7.47e-19	1.68e-14	0.21	0.458
RUVBL1	1.27039	0.342477	0.758042	8.35e-19	1.87e-14	0.491	0.156
TSPAN12	0.695606	0.0570972	0.681693	8.7e-19	1.95e-14	0.281	0.022
NPIP	2.13352	0.763984	0.828946	9.07e-19	2.03e-14	0.852	0.698
SERPINF1	0.0659435	0.663773	-0.642327	9.53e-19	2.14e-14	0.061	0.246
CTSA	0.539879	1.48635	-0.691214	1.05e-18	2.36e-14	0.352	0.637
RGCC	0.586855	2.24388	-1.03155	1.11e-18	2.49e-14	0.268	0.559
HNRPDL	4.75264	2.76413	0.611908	1.28e-18	2.87e-14	0.977	0.978
EHD3	0.755057	0.129965	0.63524	1.54e-18	3.46e-14	0.497	0.184
ABHD12	0.436495	1.17027	-0.595325	1.55e-18	3.47e-14	0.315	0.642
MRPL12	0.908225	0.228739	0.635053	1.56e-18	3.5e-14	0.532	0.212
HSD17B4	1.09725	2.80021	-0.857578	1.59e-18	3.56e-14	0.51	0.603
TMCO1	1.26161	0.502536	0.589953	2.01e-18	4.5e-14	0.831	0.642
PAICS	1.42448	0.368322	0.825268	2.11e-18	4.73e-14	0.818	0.648
B3GNT1	1.19509	0.398324	0.65058	2.32e-18	5.2e-14	0.521	0.184
RPL23A	14.8938	8.57257	0.731484	2.4e-18	5.39e-14	0.983	0.972
GGH	1.34424	0.134746	1.04675	2.52e-18	5.65e-14	0.345	0.061
CIAPIN1	1.26385	0.402221	0.691066	2.52e-18	5.65e-14	0.599	0.268
GNAS	3.51039	1.84431	0.665172	2.66e-18	5.96e-14	0.935	0.777
SNHG8	3.37742	1.19122	0.998348	2.74e-18	6.14e-14	0.693	0.447
SPARCL1	4.43225	0.627909	1.73853	3.23e-18	7.25e-14	0.348	0.061
GART	1.30064	0.393713	0.723104	3.41e-18	7.64e-14	0.667	0.363
SERBP1	1.41058	0.603903	0.587796	3.58e-18	8.04e-14	0.881	0.749
ABI2	0.925354	0.277918	0.591329	3.99e-18	8.94e-14	0.898	0.827
FAR1	0.393069	1.17254	-0.641118	4.09e-18	9.17e-14	0.412	0.67
HEY1	1.40529	0.0894078	1.14267	4.49e-18	1.01e-13	0.274	0.022
CD81	0.73542	2.04708	-0.812144	6e-18	1.35e-13	0.489	0.726
PGM1	0.894597	0.2556	0.593514	6.02e-18	1.35e-13	0.422	0.112
SRSF5	2.60049	4.45024	-0.598129	6.25e-18	1.4e-13	0.845	0.922
UBE2E3	2.77584	0.867113	1.01599	7e-18	1.57e-13	0.64	0.346
SIGMAR1	1.54615	0.424477	0.837883	7.08e-18	1.59e-13	0.592	0.291
VPS72	1.62184	0.594979	0.71704	7.36e-18	1.65e-13	0.714	0.419
FAHD2CP	0.296417	1.1856	-0.753498	7.42e-18	1.66e-13	0.222	0.43
TBCB	2.08483	4.14096	-0.736848	7.53e-18	1.69e-13	0.818	0.816
STMN2	0.661654	0.0345162	0.683664	8.71e-18	1.95e-13	0.269	0.022
SELL	0.0476104	0.633712	-0.641051	8.94e-18	2.01e-13	0.011	0.145
EIF4EBP1	1.19919	0.29003	0.769565	9.45e-18	2.12e-13	0.475	0.156
MAGED2	5.76564	2.29217	1.03919	9.67e-18	2.17e-13	0.836	0.648
RPS10	11.2381	6.45596	0.714915	1.12e-17	2.51e-13	0.938	0.883
CTHRC1	1.20171	0.246668	0.820546	1.39e-17	3.13e-13	0.341	0.061
MATR3	3.72653	2.06561	0.624607	1.52e-17	3.42e-13	0.964	0.905
PSMB4	7.49361	4.1522	0.721188	1.53e-17	3.43e-13	0.936	0.86
RSL24D1	3.78297	1.53901	0.913641	1.54e-17	3.45e-13	0.744	0.57
EIF4A1	9.36438	5.72039	0.625018	1.62e-17	3.64e-13	0.941	0.961
SHMT2	1.09913	0.283662	0.709526	1.63e-17	3.67e-13	0.531	0.223
EDNRB	1.24057	0.0400134	1.10727	1.84e-17	4.12e-13	0.32	0.056
HMOX2	0.534981	1.61959	-0.771122	1.93e-17	4.33e-13	0.382	0.598
NDUFA4	2.83003	1.49351	0.619178	2.09e-17	4.7e-13	0.942	0.821
FAM213A	1.78414	0.741199	0.677149	2.42e-17	5.43e-13	0.802	0.592
WBP2	0.906132	1.89953	-0.605172	3.13e-17	7.02e-13	0.655	0.788
UBAP2L	1.71602	0.752649	0.631955	3.3e-17	7.41e-13	0.857	0.698
FUBP1	1.49288	0.55845	0.677699	3.44e-17	7.72e-13	0.811	0.603
CTSL1	0.761067	1.87445	-0.706836	3.47e-17	7.79e-13	0.386	0.687
MSN	0.708174	1.75835	-0.69135	4.26e-17	9.55e-13	0.541	0.698
RPS9	11.8821	6.8328	0.71777	4.57e-17	1.03e-12	0.968	0.961
TALDO1	2.13095	4.26213	-0.749049	4.76e-17	1.07e-12	0.676	0.821
ATP6V0B	3.74337	6.54431	-0.669478	5.07e-17	1.14e-12	0.747	0.911
CLNS1A	4.78046	2.02209	0.935637	5.78e-17	1.3e-12	0.797	0.575
RHOC	1.69863	0.723713	0.64671	5.84e-17	1.31e-12	0.599	0.268
NCALD	0.860536	0.200814	0.631706	5.91e-17	1.33e-12	0.471	0.162
ZNF22	1.34923	0.468139	0.678199	6.54e-17	1.47e-12	0.641	0.33
ID3	1.40755	0.126787	1.09535	6.65e-17	1.49e-12	0.316	0.05
MOB1A	0.397419	1.30752	-0.723576	7.12e-17	1.6e-12	0.266	0.43
LDHA	5.28129	2.24107	0.954589	7.26e-17	1.63e-12	0.784	0.514
CDK2AP1	3.29642	1.2638	0.924388	7.82e-17	1.75e-12	0.8	0.609
MRPS24	1.90652	0.612892	0.849641	9.7e-17	2.18e-12	0.586	0.302
SUB1	1.73709	0.722204	0.668387	1.08e-16	2.42e-12	0.836	0.749
IL8	0.110363	2.05251	-1.45896	1.12e-16	2.51e-12	0.01	0.134
ATP6V0E1	2.22765	4.56989	-0.787166	1.28e-16	2.86e-12	0.575	0.782
SMYD3	0.755648	0.136401	0.627533	1.37e-16	3.07e-12	0.436	0.14
POLR2H	1.32271	0.314025	0.821813	1.54e-16	3.46e-12	0.5	0.218
PEBP1	5.58501	9.92239	-0.730032	1.58e-16	3.54e-12	0.911	0.832
DHRS7	1.62519	3.22598	-0.686864	1.61e-16	3.61e-12	0.521	0.804
JUN	3.4601	1.22265	1.0048	1.9e-16	4.27e-12	0.792	0.525
FBL	1.78403	0.721255	0.693713	2.06e-16	4.62e-12	0.686	0.402
WDR6	2.09825	0.685486	0.87829	2.06e-16	4.63e-12	0.788	0.592
CSTF3	1.31118	0.301039	0.828964	2.09e-16	4.68e-12	0.509	0.207
ASAH1	2.06776	4.85283	-0.93195	2.16e-16	4.85e-12	0.638	0.827
GAD1	0.565205	0.0365268	0.594595	2.17e-16	4.87e-12	0.282	0.039
KCNK1	0.258165	1.07768	-0.723655	2.26e-16	5.06e-12	0.126	0.369
RPL27	11.679	5.73956	0.911719	2.4e-16	5.39e-12	0.94	0.905
NHP2L1	3.21851	1.51782	0.744561	2.62e-16	5.87e-12	0.833	0.743
SNRPD1	1.47812	0.534512	0.691466	2.69e-16	6.04e-12	0.685	0.425
SNRPF	1.38435	0.460188	0.707441	3.1e-16	6.96e-12	0.683	0.419
USP11	2.38068	1.17083	0.639067	3.36e-16	7.53e-12	0.885	0.737
GNL3	1.5491	0.542917	0.724325	3.9e-16	8.74e-12	0.634	0.335
TMEM59	3.63484	7.11142	-0.807435	3.95e-16	8.87e-12	0.807	0.911
CCT6A	3.38748	1.52127	0.799239	4.02e-16	9.03e-12	0.86	0.698
EGR3	0.355636	1.38589	-0.815556	4.05e-16	9.08e-12	0.32	0.402
APOBEC3C	0.0691297	0.613516	-0.593771	4.33e-16	9.72e-12	0.048	0.201
ATP5D	2.24275	1.06251	0.652817	4.54e-16	1.02e-11	0.826	0.609
ANXA5	4.2727	7.32481	-0.658876	4.95e-16	1.11e-11	0.78	0.922
PDE4DIP	2.00861	0.850821	0.700929	5.17e-16	1.16e-11	0.883	0.737
CCNH	1.06251	2.82095	-0.889525	5.5e-16	1.23e-11	0.491	0.648
CCT7	4.96563	2.499	0.769732	5.52e-16	1.24e-11	0.856	0.698
IL17RB	0.836701	0.142853	0.684478	6.75e-16	1.51e-11	0.373	0.095
2021-09-07	1.89868	4.05784	-0.803123	6.99e-16	1.57e-11	0.85	0.832
RELL1	0.327706	1.06632	-0.638129	7.14e-16	1.6e-11	0.663	0.777
ADA	0.083205	0.774963	-0.712483	7.46e-16	1.67e-11	0.066	0.229
DNASE2	0.332682	1.33644	-0.809977	7.72e-16	1.73e-11	0.269	0.458
RPS4Y1	3.55686	0.575028	1.53266	7.94e-16	1.78e-11	0.285	0.117
PIGP	0.259302	1.06087	-0.710627	8.03e-16	1.8e-11	0.14	0.369
ATP5B	9.47016	5.7229	0.639129	8.43e-16	1.89e-11	0.947	0.916
NOP58	1.79839	0.697811	0.720922	9.01e-16	2.02e-11	0.747	0.508
LMF1	1.94481	0.901335	0.631161	9.3e-16	2.09e-11	0.797	0.52
KANK1	0.840145	0.215664	0.598075	9.4e-16	2.11e-11	0.642	0.374
NDUFS5	3.48029	1.59265	0.789165	1.04e-15	2.32e-11	0.779	0.62
LINC00263	0.227689	0.844702	-0.587442	1.08e-15	2.41e-11	0.219	0.458
ATXN7L3B	1.82397	0.816442	0.636611	1.51e-15	3.39e-11	0.771	0.508
EMC2	0.714844	2.28221	-0.936588	1.51e-15	3.4e-11	0.244	0.497
PRNP	2.6962	5.5513	-0.825737	1.69e-15	3.79e-11	0.725	0.827
RPS12	21.3064	11.6317	0.820407	1.73e-15	3.89e-11	0.946	0.966
TUFM	3.8662	2.12343	0.639665	1.77e-15	3.96e-11	0.849	0.743
RPL13AP5	13.9493	6.76486	0.945042	1.93e-15	4.33e-11	0.888	0.782
CKB	10.5069	5.73251	0.773283	2.05e-15	4.6e-11	0.929	0.754
ZNF488	0.465366	1.4912	-0.765579	2.17e-15	4.87e-11	0.228	0.453
RIN2	0.465831	1.29815	-0.648752	2.25e-15	5.05e-11	0.486	0.648
SOX8	0.874903	0.239113	0.597508	2.28e-15	5.12e-11	0.566	0.279
YTHDF2	1.80657	0.659425	0.758123	2.34e-15	5.24e-11	0.709	0.536
SVIP	0.329014	1.15164	-0.69508	2.74e-15	6.15e-11	0.23	0.43
TTYH1	3.7395	1.55987	0.88866	3.1e-15	6.96e-11	0.776	0.486
NME7	0.980365	0.166174	0.763983	3.77e-15	8.45e-11	0.431	0.173
FNTA	0.522637	1.33781	-0.618585	3.86e-15	8.66e-11	0.321	0.62
SAMHD1	0.270227	0.906494	-0.585835	4.41e-15	9.9e-11	0.254	0.419
CCT5	2.43365	1.09789	0.710803	4.58e-15	1.03e-10	0.798	0.598
ZNF195	0.935801	0.269483	0.60869	4.94e-15	1.11e-10	0.613	0.335
FAM49B	0.935141	2.00205	-0.633508	5.16e-15	1.16e-10	0.58	0.799
NDUFS7	2.12865	4.07562	-0.698043	5.25e-15	1.18e-10	0.72	0.793
SLC25A6	9.57711	5.20676	0.769033	5.71e-15	1.28e-10	0.967	0.95
PSME1	1.42251	2.88345	-0.680837	6.1e-15	1.37e-10	0.513	0.771
ITGB1	0.750305	1.84086	-0.698719	6.77e-15	1.52e-10	0.564	0.737
DDOST	3.26672	1.70102	0.659622	6.97e-15	1.56e-10	0.909	0.855
HNRNPA2B1	7.03577	4.32166	0.59456	7.06e-15	1.58e-10	0.986	0.989
RBP1	2.28398	0.901095	0.788614	7.32e-15	1.64e-10	0.633	0.369
SNHG6	2.23118	0.920349	0.750693	7.44e-15	1.67e-10	0.718	0.458
S1PR1	0.514606	0	0.598942	7.53e-15	1.69e-10	0.165	0
G3BP1	1.75036	0.676412	0.714244	7.72e-15	1.73e-10	0.767	0.553
SERINC1	2.83511	5.36967	-0.731953	7.86e-15	1.76e-10	0.836	0.905
DUSP12	1.46889	0.484706	0.733683	8e-15	1.8e-10	0.474	0.179
S100A4	0.0402627	1.07321	-0.994916	8.25e-15	1.85e-10	0.006	0.112
NDUFA13	4.75735	2.49087	0.721817	1.27e-14	2.85e-10	0.866	0.754
ATXN10	2.46654	1.24875	0.624375	1.28e-14	2.87e-10	0.831	0.615
DGUOK	1.4245	0.496827	0.695783	1.39e-14	3.12e-10	0.6	0.318
TSPAN15	0.462084	1.42014	-0.727065	1.41e-14	3.16e-10	0.269	0.497
MAD2L2	1.22007	0.341961	0.726264	1.43e-14	3.2e-10	0.498	0.212
SNRPG	2.81594	1.08848	0.869582	1.71e-14	3.84e-10	0.667	0.425
FAM69A	0.414858	1.13991	-0.596895	1.73e-14	3.87e-10	0.323	0.57
PRELID1	2.39371	1.11648	0.681197	1.97e-14	4.42e-10	0.716	0.603
EIF3F	7.31784	3.84661	0.779234	2.26e-14	5.06e-10	0.857	0.782
WDR54	1.00612	0.199589	0.74187	2.74e-14	6.16e-10	0.39	0.128
CRYL1	0.722215	1.85297	-0.728199	3.12e-14	7.01e-10	0.327	0.575
C8orf33	1.52597	0.523274	0.729663	3.13e-14	7.02e-10	0.733	0.642
SKA2	1.04122	0.239363	0.719835	3.43e-14	7.69e-10	0.717	0.52
SNAP25	0.814141	0.139352	0.671072	3.86e-14	8.67e-10	0.295	0.056
RPL13A	16.599	7.57804	1.03677	4.43e-14	9.93e-10	0.9	0.911
RPL23	13.7253	7.38607	0.812234	4.69e-14	1.05e-09	0.955	0.955
ANAPC11	2.59321	1.20506	0.704452	5.08e-14	1.14e-09	0.8	0.609
OMG	2.76031	4.81807	-0.629689	5.11e-14	1.15e-09	0.553	0.503
ARF4	3.62709	1.74813	0.751654	5.15e-14	1.16e-09	0.783	0.626
RPS6	34.0627	17.988	0.884847	5.16e-14	1.16e-09	0.985	0.994
NIPSNAP1	1.26595	0.408061	0.686408	5.21e-14	1.17e-09	0.554	0.285
CHTOP	2.37012	1.00133	0.751839	5.24e-14	1.18e-09	0.791	0.62
KLHDC3	1.94064	0.823537	0.689393	5.56e-14	1.25e-09	0.698	0.436
SUMO1	2.73708	1.2236	0.749011	5.94e-14	1.33e-09	0.737	0.508
COX7C	9.79242	5.708	0.686063	5.97e-14	1.34e-09	0.924	0.844
FNTB	0.212079	0.93604	-0.675625	7.26e-14	1.63e-09	0.146	0.33
KIFAP3	2.13824	0.839592	0.770568	7.98e-14	1.79e-09	0.641	0.346
PDIA6	3.71816	1.77017	0.768252	8.43e-14	1.89e-09	0.847	0.687
ACBD6	1.45925	0.480085	0.732539	8.7e-14	1.95e-09	0.571	0.296
SCFD2	0.862648	0.142813	0.704765	8.78e-14	1.97e-09	0.483	0.218
RARS	0.941572	0.180432	0.71791	8.83e-14	1.98e-09	0.394	0.14
CD58	0.338645	1.18604	-0.707545	8.9e-14	2e-09	0.108	0.33
MDH2	3.15163	1.68238	0.630165	9.87e-14	2.21e-09	0.81	0.676
ADSL	1.59129	0.519638	0.769943	1.15e-13	2.57e-09	0.535	0.251
TXNIP	2.31401	1.20828	0.585651	1.33e-13	2.97e-09	0.681	0.397
AQP4	3.84557	0.000565363	2.27585	1.4e-13	3.15e-09	0.197	0.022
SLC2A3	0.182114	0.801151	-0.60755	1.46e-13	3.28e-09	0.274	0.436
IER2	8.75212	3.91863	0.98746	1.63e-13	3.66e-09	0.86	0.743
SFRP2	0.820092	0.00535419	0.856308	1.79e-13	4.01e-09	0.178	0.006
FLAD1	1.26654	0.437499	0.656931	1.9e-13	4.26e-09	0.571	0.302
RBMX	5.47042	3.01151	0.689715	2.12e-13	4.76e-09	0.89	0.849
PCMTD2	1.71268	0.775436	0.611544	2.16e-13	4.85e-09	0.723	0.458
HSD17B11	0.678149	1.54212	-0.599159	2.2e-13	4.94e-09	0.33	0.603
MGST1	0.788361	0.0711156	0.739524	2.38e-13	5.35e-09	0.233	0.028
GPR89A	0.992879	0.284516	0.633629	2.67e-13	5.99e-09	0.504	0.223
PIGT	1.12843	2.50082	-0.717902	2.77e-13	6.22e-09	0.506	0.682
GPSM2	0.904898	0.167324	0.706509	2.85e-13	6.4e-09	0.417	0.168
NOP56	1.64482	0.715307	0.624701	3.04e-13	6.82e-09	0.766	0.553
ZNF883	0.772422	0.179021	0.588132	3.79e-13	8.5e-09	0.437	0.184
TADA1	1.27009	0.347476	0.752492	3.84e-13	8.62e-09	0.472	0.212
ITPA	1.55697	0.633856	0.646152	4.09e-13	9.18e-09	0.633	0.391
HIST1H4C	1.7902	0.33495	1.06358	5.54e-13	1.24e-08	0.43	0.179
NMB	0.598103	0.0112296	0.660249	6.42e-13	1.44e-08	0.188	0.011
SEPW1	4.59796	7.40309	-0.586018	6.58e-13	1.48e-08	0.922	0.816
APOA1BP	2.52643	1.16647	0.702861	6.64e-13	1.49e-08	0.735	0.475
SERINC3	1.4028	2.86375	-0.685283	6.79e-13	1.52e-08	0.55	0.732
MFSD1	0.99708	2.1122	-0.640043	7.94e-13	1.78e-08	0.389	0.648
CNIH4	2.13269	0.708101	0.875011	9.58e-13	2.15e-08	0.547	0.279
EIF3I	3.57134	1.76822	0.723657	1.04e-12	2.34e-08	0.894	0.86
ZNF32	1.96273	0.656397	0.838877	1.04e-12	2.34e-08	0.531	0.285
EEF1B2	11.2535	6.99422	0.616166	1.1e-12	2.47e-08	0.901	0.883
KPNA2	2.61202	0.784293	1.01745	1.15e-12	2.59e-08	0.545	0.274
DNPH1	1.41726	0.492706	0.695441	1.39e-12	3.13e-08	0.532	0.285
PAQR6	0.494685	1.28213	-0.610537	1.44e-12	3.24e-08	0.31	0.402
TMEM106C	1.01626	0.261009	0.677101	1.71e-12	3.84e-08	0.328	0.089
MRPS26	1.82097	0.741853	0.695566	1.83e-12	4.1e-08	0.613	0.358
BSCL2	1.60246	0.594519	0.706756	2.07e-12	4.64e-08	0.541	0.274
APEX1	3.60074	1.8118	0.710374	2.43e-12	5.46e-08	0.756	0.581
MLC1	0.862126	0.065619	0.805259	2.53e-12	5.67e-08	0.315	0.095
HLA-A	3.63192	5.99336	-0.594375	3.49e-12	7.82e-08	0.857	0.916
SEC11C	1.93244	3.92454	-0.747885	3.59e-12	8.05e-08	0.496	0.592
C16orf80	2.5477	1.12762	0.737642	4.22e-12	9.47e-08	0.619	0.352
TXN2	2.69638	1.2452	0.719273	5e-12	1.12e-07	0.723	0.508
CREG1	0.743897	1.99583	-0.780642	5.45e-12	1.22e-07	0.374	0.542
DLL1	0.781504	0.183061	0.590572	6.12e-12	1.37e-07	0.421	0.168
TIMM17A	1.61555	0.606662	0.703047	6.86e-12	1.54e-07	0.655	0.458
MAD2L1	1.37332	0.12677	1.07471	7.1e-12	1.59e-07	0.253	0.05
NIPSNAP3A	0.525663	1.38667	-0.645563	7.4e-12	1.66e-07	0.203	0.441
JUNB	5.37263	10.5736	-0.860873	7.85e-12	1.76e-07	0.801	0.816
ERH	1.85303	0.767417	0.69085	8.23e-12	1.85e-07	0.651	0.441
CTSK	1.06394	0.152717	0.840366	9.74e-12	2.19e-07	0.307	0.095
DHX9	1.57504	0.714201	0.587059	1.04e-11	2.34e-07	0.816	0.687
PENK	0.608164	0.0166112	0.661646	1.04e-11	2.34e-07	0.173	0.011
EGR1	15.2265	7.1119	1.00024	1.05e-11	2.35e-07	0.921	0.81
ERGIC3	4.22877	2.18784	0.713892	1.18e-11	2.64e-07	0.822	0.648
H2AFZ	6.14804	2.43676	1.0565	1.24e-11	2.78e-07	0.767	0.62
NAE1	1.49122	0.476517	0.754654	1.27e-11	2.85e-07	0.525	0.291
RARRES2	0.733495	0.100792	0.655142	1.53e-11	3.43e-07	0.241	0.045
EIF3H	6.80047	3.87456	0.678291	1.92e-11	4.3e-07	0.879	0.844
DTD1	1.80301	0.827148	0.617383	1.97e-11	4.42e-07	0.682	0.441
H2AFV	1.63306	0.632063	0.690043	2.25e-11	5.05e-07	0.737	0.626
RP1-177G6.2	1.31638	0.265981	0.871614	3.49e-11	7.84e-07	0.566	0.447
RBBP7	2.9383	1.31262	0.768046	4.39e-11	9.85e-07	0.693	0.514
UCP2	0.590045	1.46189	-0.630698	4.73e-11	1.06e-06	0.322	0.363
NAMPT	0.49016	1.55371	-0.77713	5.83e-11	1.31e-06	0.429	0.542
SEC61G	1.49528	0.6536	0.593594	5.99e-11	1.34e-06	0.597	0.374
SF3B14	3.22008	1.62401	0.685497	6.93e-11	1.55e-06	0.753	0.542
KARS	1.84407	0.758361	0.693726	9.37e-11	2.1e-06	0.627	0.436
GPR37L1	1.51787	0.490913	0.756009	1.09e-10	2.44e-06	0.672	0.799
MPC1	2.23098	4.37113	-0.733256	1.13e-10	2.54e-06	0.565	0.67
CPSF3	1.28611	0.438888	0.667939	1.21e-10	2.71e-06	0.48	0.246
ING4	1.73455	0.748847	0.6449	1.24e-10	2.77e-06	0.595	0.369
CCNB1IP1	0.972033	0.185782	0.733845	1.25e-10	2.8e-06	0.327	0.123
COPZ1	1.94118	0.936849	0.602684	1.31e-10	2.94e-06	0.713	0.525
MAGEH1	2.91734	1.51733	0.637982	1.35e-10	3.03e-06	0.689	0.436
ARL2BP	2.04649	0.738651	0.80918	1.55e-10	3.47e-06	0.553	0.318
ATP6V1G1	2.637	1.36047	0.623675	1.56e-10	3.49e-06	0.756	0.642
COQ9	1.35677	0.547292	0.607066	2.24e-10	5.01e-06	0.513	0.274
NUP35	1.05704	0.359708	0.597273	2.34e-10	5.25e-06	0.402	0.168
CCDC104	1.01723	0.339552	0.590629	2.42e-10	5.42e-06	0.437	0.196
EIF3M	3.34106	1.62684	0.724719	2.69e-10	6.03e-06	0.74	0.609
EEF1A1	62.2933	38.6151	0.676004	2.78e-10	6.24e-06	1	1
C2orf40	0.67628	0.0305726	0.701817	3.08e-10	6.92e-06	0.157	0.011
DCAF13	1.64628	0.606928	0.719662	3.43e-10	7.7e-06	0.567	0.363
GATM	1.31422	2.60687	-0.640226	3.61e-10	8.11e-06	0.489	0.654
AMD1	1.50183	2.80237	-0.603917	3.71e-10	8.32e-06	0.616	0.777
ZWINT	0.722491	0.0598575	0.700626	3.9e-10	8.76e-06	0.179	0.022
RHEB	1.90482	0.920014	0.59733	4.71e-10	1.06e-05	0.719	0.542
STOML2	1.83357	0.869306	0.600119	4.78e-10	1.07e-05	0.634	0.419
TUBB4B	4.52091	2.07488	0.844375	5.08e-10	1.14e-05	0.837	0.765
JKAMP	0.917172	2.00922	-0.650411	5.29e-10	1.19e-05	0.335	0.547
ARMCX1	1.0603	0.370222	0.588442	5.57e-10	1.25e-05	0.385	0.156
ATIC	1.8175	0.851302	0.605876	7.2e-10	1.62e-05	0.611	0.385
ZFP36L2	0.528085	1.37535	-0.636418	7.87e-10	1.77e-05	0.513	0.637
PPT1	2.45391	4.46049	-0.660799	8.82e-10	1.98e-05	0.665	0.76
SNRPB	2.81769	1.41178	0.662599	9.18e-10	2.06e-05	0.724	0.57
PRDX6	2.46355	1.21678	0.643786	1.09e-09	2.44e-05	0.737	0.631
METTL3	1.16689	0.405883	0.624152	1.09e-09	2.44e-05	0.504	0.291
FN1	0.11383	2.06435	-1.46005	1.14e-09	2.55e-05	0.233	0.151
MSTN	0.967148	0.0110307	0.960278	1.23e-09	2.75e-05	0.134	0.006
ADH5	1.74032	0.772077	0.628905	1.31e-09	2.94e-05	0.661	0.447
IFITM3	0.888895	2.43405	-0.86237	1.4e-09	3.14e-05	0.15	0.352
OST4	3.06781	1.59695	0.647434	1.46e-09	3.28e-05	0.756	0.592
ANP32E	1.59942	0.530318	0.764358	2.61e-09	5.85e-05	0.57	0.374
PAR-SN	1.44739	0.449698	0.755489	2.69e-09	6.04e-05	0.735	0.659
CKS1B	1.70167	0.540859	0.810119	3.45e-09	7.74e-05	0.45	0.24
TAF7	2.40155	1.22832	0.610236	3.73e-09	8.38e-05	0.715	0.531
DDX1	2.17124	1.08127	0.607582	3.82e-09	8.56e-05	0.742	0.542
GNPAT	1.55105	0.658514	0.621202	4.11e-09	9.22e-05	0.631	0.458
MRPL3	2.30699	1.08192	0.667601	4.54e-09	0.000101816	0.652	0.447
UBE2T	1.43859	0.10998	1.13551	4.78e-09	0.000107162	0.207	0.056
ANAPC13	2.04491	0.829746	0.734755	4.8e-09	0.000107746	0.509	0.302
WBP5	2.51109	1.28386	0.620448	4.85e-09	0.000108873	0.603	0.369
CDK1	0.971427	0.0505464	0.9081	5.47e-09	0.000122758	0.153	0.017
GJA1	0.660607	0.0204665	0.702482	6.19e-09	0.000138881	0.191	0.045
CHIC2	1.24893	0.401517	0.682252	8.01e-09	0.000179738	0.446	0.251
NOL11	0.946891	0.248573	0.640893	8.41e-09	0.000188603	0.39	0.207
LBR	1.13671	0.402569	0.607316	8.9e-09	0.000199698	0.562	0.385
FH	1.32041	0.52326	0.607218	9.02e-09	0.000202342	0.527	0.324
CSRP2	0.646513	0.046162	0.654307	9.54e-09	0.000213941	0.179	0.039
RGS5	0.0796192	0.660335	-0.620951	1.12e-08	0.000251577	0.113	0.101
PDCD5	2.29484	1.13083	0.628797	1.28e-08	0.000288245	0.655	0.458
TMOD1	0.819833	0.187904	0.615388	1.41e-08	0.00031581	0.439	0.263
CKS2	1.63234	0.46801	0.842487	1.49e-08	0.00033408	0.365	0.168
EIF6	2.35786	1.19114	0.615861	1.67e-08	0.000373803	0.632	0.453
YAE1D1	1.29255	0.506288	0.605953	2.44e-08	0.000547265	0.396	0.19
COA4	1.87457	0.914317	0.586516	2.76e-08	0.00061933	0.662	0.48
HMGN2	8.4611	4.85441	0.692485	3.4e-08	0.000761782	0.961	0.933
CCT8	3.52786	1.95136	0.617448	3.42e-08	0.000766897	0.731	0.609
ANXA2	0.411168	1.34669	-0.733738	3.96e-08	0.000889044	0.149	0.223
IDH1	2.41111	0.9751	0.788316	4.14e-08	0.000929322	0.573	0.391
COMMD3	2.45222	1.21358	0.641144	4.2e-08	0.000942573	0.627	0.419
FAM64A	0.540376	0.0227743	0.590795	5.23e-08	0.00117245	0.128	0.011
EIF3E	6.01197	3.38608	0.676888	7.14e-08	0.00160264	0.824	0.732
BTG3	2.05708	1.02517	0.594107	2.26e-07	0.00506065	0.636	0.508
PSMD14	2.61999	1.31602	0.644338	3.14e-07	0.00705228	0.672	0.536
UBE2C	0.976514	0.0217246	0.951952	4.06e-07	0.00909926	0.139	0.028
PPAP2B	2.03892	0.925939	0.657996	4.24e-07	0.00951367	0.638	0.447
CYTL1	0.617936	1.47616	-0.613949	4.82e-07	0.0108214	0.194	0.268
PDCD6	3.3956	1.90539	0.597328	8.42e-07	0.0188834	0.711	0.57
DUSP2	0.119783	0.821236	-0.701698	1.03e-06	0.0231169	0.065	0.128
AGT	2.8575	0.148653	1.74772	2.23e-06	0.0501349	0.157	0.084
PSMA6	4.06992	2.26441	0.635141	2.55e-06	0.0571016	0.689	0.581
HSPB8	0.824669	0.0772005	0.760348	2.88e-06	0.0645852	0.129	0.022
NUSAP1	0.628967	0.0299313	0.66141	2.98e-06	0.0667556	0.145	0.039
IER3IP1	1.46623	0.626639	0.600416	4.29e-06	0.0962395	0.448	0.318
GMNN	1.00959	0.22834	0.710194	5.74e-06	0.12879	0.231	0.101
EZR	1.90254	0.471606	0.979925	6.59e-06	0.147776	0.416	0.369
H3F3A	7.75917	4.35484	0.70995	7.74e-06	0.173617	0.692	0.615
PBK	0.682526	0.0718548	0.65052	9.1e-06	0.204117	0.12	0.028
ITM2A	0.981446	2.16175	-0.674168	9.16e-06	0.205403	0.263	0.168
MORN2	1.19698	0.406608	0.643304	1.02e-05	0.229392	0.31	0.156
S100A16	1.05226	0.325533	0.630639	1.53e-05	0.343054	0.243	0.112
KIAA0101	0.646621	0.0886257	0.597001	1.63e-05	0.365049	0.416	0.391
MIR568	1.12902	0.28432	0.729185	2.51e-05	0.562657	0.206	0.089
HRSP12	1.06928	0.370946	0.593954	5.38e-05	1	0.304	0.179
RRM2	0.744109	0.0379765	0.748716	8.37e-05	1	0.553	0.553
RAMP1	2.86093	1.47713	0.640276	0.000544668	1	0.478	0.369
G0S2	0.271327	1.11759	-0.73609	0.00071513	1	0.111	0.078
HMGB2	1.38788	0.483185	0.687032	0.000838213	1	0.342	0.251
CCL2	0.507357	2.35209	-1.15304	0.00199089	1	0.04	0.101
CLU	5.55812	1.6538	1.30522	0.361511	1	0.469	0.419
